# Supplementary material
Source: MDPI journal article supplement (https://www.mdpi.com/2076-3263/11/12/518)
Supplement: s1 [file s1]

Archive with 5 entries (5 files):
- analytical methodology.pdf
- supplementary Table S1.xlsx
- supplementary Table S2.xlsx
- Supplementary Table S3.xlsx
- Supplementary Table S4.xlsx
