# Supplementary material
Source: MDPI journal article supplement (https://www.mdpi.com/2076-3263/11/12/518)
Supplement: s1 [file s1 › supplementary Table S1.xlsx]

## Sheet: U-Pb age
Supplementary Table 1. A list of published geochronological results of Cenozoic magmatic rocks, SE Tibet
No.	Sample No.	Lithology	Longtitude (°E)	Latitude (°N)	Weighted mean age (Ma)	Uncentaity (± Ma)	Method	Data source
1	Y0859B	Gabbro	99.6978	26.7397	34.2	0.3	Zircon U-Pb(LA-MC-ICP-MS )	Wang Wei, Zeng Lingsen, Gao Li-E,Wang Qian, Guo Chunli, Hou Kejun, Zeng Jing Liu. 2018. Eocene-Oligocene potassic high Ba-Sr granitoids in the Southeastern Tibet: Petrogenesis and tectonic implications. Lithos, 322: 38–51.
2	Y0861	Granite porphyry	99.7806	26.7792	33.5	0.2	Zircon U-Pb(LA-MC-ICP-MS )
3	Y0504	Granite porphyry	99.6917	26.7569	33.1	0.2	Zircon U-Pb(LA-MC-ICP-MS )
4	Y0504-10	Granite porphyry	99.6917	26.7569	34	0.1	Zircon U-Pb(LA-MC-ICP-MS )
5	Y0504-12	Granite porphyry	99.6917	26.7569	33.2	0.1	Zircon U-Pb(LA-MC-ICP-MS )
6	Y0863	Syenite	99.9278	26.5828	33.8	0.2	Zircon U-Pb(LA-MC-ICP-MS )
7	YQSSH	Trachyte	99.8431	26.5397	36.9	0.9	Zircon U-Pb(LA-MC-ICP-MS )
8	10THC01-3	Granite porphyry	99.7672	26.7786	36.1	1.1	Zircon U-Pb(LA–ICP–MS)	Liu Zheng, Liao Shiyong, Wang Jinrong, Ma Zhen, Liu Yixin, Wang Dongbing, Tang Yuan, Yang Jing. 2017. Petrogenesis of late Eocene high Ba-Sr potassic rocks from western Yangtze Block, SE Tibet: A magmatic response to the Indo-Asian collision. Journal of Asian Earth Sciences, 135: 95–109.
9	10THC01-6	Granite porphyry	99.7781	26.7847	35.9	0.5	Zircon U-Pb(LA–ICP–MS)
10	10XQT01-1	Quartz-monzonite porphyry	99.6911	26.7578	36	0.6	Zircon U-Pb(LA–ICP–MS)
11	10XQT01-3	Quartz-monzonite porphyry	99.6978	26.7581	36.5	0.3	Zircon U-Pb(LA–ICP–MS)
12	10JC01-1	Syenite	99.9156	26.5933	35.1	0.8	Zircon U-Pb(LA–ICP–MS)
13	BY-9	Alkali feldspar granite porphyry	100.18	26.1462	36.2	0.3	Zircon U-Pb(SHRIMP II)	Lu Yong Jun, Kerrich Robert, Cawood Peter A., McCuaig T. Campbell, Hart Craig J.R., Li Zhengxiang, Hou Zengqian, Bagas Leon. 2012. Zircon SHRIMP U–Pb geochronology of potassic felsic intrusions in western Yunnan, SW China: Constraints on the relationship of magmatism to the Jinsha suture. Gondwana Research, 22: 737-747.
14	56ZK14-4	Alkali feldspar syenite porphyry	100.2	26.1809	34.6	0.5	Zircon U-Pb(SHRIMP II)
15	BXC-2	Amphibole monzogranite porphyry	100.452	25.5341	35	0.2	Zircon U-Pb(SHRIMP II)
16	BC-5	Amphibole quartz monzonite porphyry	100.476	25.7925	36.6	0.6	Zircon U-Pb(SHRIMP II)
17	JC-1	Amphibole syenite	99.7253	26.6323	35.4	0.3	Zircon U-Pb(SHRIMP II)
18	JC-9	Amphibole syenite	99.9197	26.5842	35.6	0.3	Zircon U-Pb(SHRIMP II)
19	BXC-8	Biotite amphibole monzogranite	100.426	25.5278	35.6	0.3	Zircon U-Pb(SHRIMP II)
20	DHS-4	Biotite granite porphyry	100.974	26.8595	34.1	0.3	Zircon U-Pb(SHRIMP II)
21	JC-7	Biotite monzogranite porphyry	99.8121	26.6567	35.3	0.4	Zircon U-Pb(SHRIMP II)
22	BY-YKD	Biotite monzogranite porphyry	100.184	26.1628	36.8	0.7	Zircon U-Pb(SHRIMP II)
23	DHS-1	Biotite quartz monzodiorite porphyry	100.986	26.8467	33.1	0.4	Zircon U-Pb(SHRIMP II)
24	BC-4	Biotite quartz monzonite porphyry	100.657	25.7736	35.4	0.4	Zircon U-Pb(SHRIMP II)
25	YA-2	Biotite quartz monzonite porphyry	101.289	25.3853	33.4	0.3	Zircon U-Pb(SHRIMP II)
26	LH-1	Biotite-amphibole-augite syenite porphyry	100.329	26.4522	36.9	0.3	Zircon U-Pb(SHRIMP II)
27	BNC-3	Granite porphyry	100.931	27.3614	32.5	0.3	Zircon U-Pb(SHRIMP II)
28	BXC-9	Granitic aplite	100.426	25.5278	34.4	0.2	Zircon U-Pb(SHRIMP II)
29	SG-12	Monzogranite porphyry	99.7764	26.7819	35.7	0.2	Zircon U-Pb(SHRIMP II)
30	72ZK11-207	Monzogranite porphyry	100.197	26.1788	36.9	0.3	Zircon U-Pb(SHRIMP II)
31	BL-2	Monzogranite porphyry	100.226	26.1478	35.7	0.8	Zircon U-Pb(SHRIMP II)
32	TKT	Monzonite porphyry	100.204	26.164	36.9	0.7	Zircon U-Pb(SHRIMP II)
33	PTS	Quartz monzonite porphyry	100.186	26.2873	36.5	0.8	Zircon U-Pb(SHRIMP II)
34	WS-4	Quartz monzonite porphyry	100.287	25.1545	35.4	0.6	Zircon U-Pb(SHRIMP II)
35	LD-1	Granite	97.8625	24.9706	56.3	1.1	Zircon U–Pb(LA-ICP-MS)	Xu Yigang, Yang Qijun, Lan Jiangbo, Luo Zhenyu, Huang Xiaolong, Shi Yuruo, Xie Liewen. 2012. Temporal-spatial distribution and tectonic implications of the batholiths in the Gaoligong-Tengliang-Yingjiang area, western Yunnan: Constraints from zircon U-Pb ages and Hf isotopes. Journal of Asian Earth Sciences, 53: 151–175.
36	CBZ-4	Granite	97.7533	25.0194	66.1	1.3	Zircon U–Pb(LA-ICP-MS)
37	CBZ-6	Granite	97.7533	25.0194	65.8	2.3	Zircon U–Pb(LA-ICP-MS)
38	TCLL-9	Granite	98.2564	24.9258	53.2	0.6	Zircon U–Pb(SHRIMP)
39	YJ-23	Granite	97.7336	24.7103	52.1	0.8	Zircon U–Pb(LA-ICP-MS)
40	NB07-18	Granite	97.5831	24.6117	54.5	1.6	Zircon U–Pb(LA-ICP-MS)
41	BY	Biotite hornblende monzogranite	103.229	22.8033	35.84	0.29	Zircon U–Pb(LA-ICP-MS)	Hu Xioajia. 2012. Petrogenesis and geological significance of Cenozoic K-rich intermediate-acid plutons along Ailao Shan-Red River fault zone (Dissertation for Master Degree). Northwest University, Xi'an (in Chinese with English abstract).
42	MTW	Biotite hornblende syenite porphyry	100.135	26.1256	36.77	0.47	Zircon U–Pb(LA-ICP-MS)
43	LH	Hpyroxene Pyroxene syenite porphyry	100.303	26.4367	36.2	0.46	Zircon U–Pb(LA-ICP-MS)
44	PAZ	Pyroxene syenogranite	103.265	22.7783	35.48	0.37	Zircon U–Pb(LA-ICP-MS)
45	DZ	Quartz syenite	103.254	22.7836	35.99	0.21	Zircon U–Pb(LA-ICP-MS)
46	SG	Quartz syenite porphyry	100.208	26.3175	36.77	0.46	Zircon U–Pb(LA-ICP-MS)
47	TC	Syenite porphyry	103.036	22.8044	35.24	0.96	Zircon U–Pb(LA-ICP-MS)
48	LHS15D13B1	Biotite monzonite	100.312	25.1974	33.45	0.31	Zircon U–Pb(LA-ICP-MS)	Du Bin. 2017. Magma Source, Formation Mechanism and Tectonic Significance of the Dalianhuashan and Zhuopan Plutons, Yunan Province (Dissertation for Master Degree). China University of Geosciences, Beijing (in Chinese with English abstract).
49	ZP15D14B1-1	Gabbro	99.4364	25.4814	34.22	0.33	Zircon U–Pb(LA-ICP-MS)
50	LHS15D07B1	Hornblende monzonite porphyry	100.309	25.1956	33.74	0.38	Zircon U–Pb(LA-ICP-MS)
51	ZP15D05B1	Syenite	99.4342	25.4805	33.4	0.38	Zircon U–Pb(LA-ICP-MS)
52	11BB1	Lamprophyre	100.436	25.5153	33.77	0.11	Zircon U–Pb(LA-ICP-MS)	Jia Liqiong, Mo Xuanxue, Dong Guochen, Xu Wenyi, Wang Liang, Guo Xiaodong, Wang Zhihua, Wei Shaogang. 2013. Genesis of lamprophyres from Machangqing, western Yunnan: Constraints from geochemistry, geochronology and Sr-Nd-Pb-Hf isotopes. Acta Petrologica Sinica, 29(4): 1247-1260 (in Chinese with English abstract)
53	WSD-28	Lamprophyre	100.203	26.167	34.92	0.66	Zircon U–Pb(LA-ICP-MS)	He Wenyan, Mo Xuanxue, Yu Xuehui, Dong Guochen, He Zhonghua, Huang Xiongfei, Li Xiaowei, Jiang Lili. 2014. Genesis and geodynamic settings of lamprophyres from Beiya, western Yunnan: Constraints from geochemistry, geochronology and Sr-Nd-Pb-Hf isotopes. Acta Petrologica Sinica, 30(11): 3287-3300 (in Chinese with English abstract)
54	D1072-5	Trachytic lava	99.608	26.4512	33.1	1.2	Zircon U–Pb(LA-ICP-MS)	Han Xue. 2017. Petrology,Geochronology, and Geochemistry of the magmatic rocks from the Madeng Cenozoic Volcanic Basin, the Sanjiang orogenic belt, western Yunnan, and Geological significance (Dissertation for Master Degree). China University of Geosciences, Beijing (in Chinese with English abstract).
55	D1073-6	Trachytic lava	99.6087	26.4554	34.7	1.3	Zircon U–Pb(LA-ICP-MS)
56	D4044-1B	Trachytic lava	99.6054	26.4576	35.36	0.52	Zircon U–Pb(LA-ICP-MS)
57	D1071-2	Trachytic volcanic bomb	99.6085	26.4499	34.71	0.95	Zircon U–Pb(LA-ICP-MS)
58	D2025-6	Trachytic volcanic breccia	99.6082	26.4597	34.5	1.4	Zircon U–Pb(LA-ICP-MS)
59	D2025-7	Trachytic volcanic breccia	99.6035	26.4581	35.47	0.9	Zircon U–Pb(LA-ICP-MS)
60	DL-JDS	Biotite monzogranite	100.432	25.5382	38.44	0.47	Zircon U–Pb(LA-ICP-MS)	Li Yong. 2012. Geochronology, Petrogenesis and Geological significance of the Cenozoic potassic magmatic rocks in sanjiang area, western Yunnan (Doctor dissertation). China University of Geosciences, Beijing (in Chinese with English abstract)
61	YA-WHC-2	Biotite monzonite porphyry	101.216	25.4197	34.17	0.45	Zircon U–Pb(LA-ICP-MS)
62	JC-JWT	Biotite peridotite latite	99.6579	26.438	34.07	0.73	Zircon U–Pb(LA-ICP-MS)
63	YA-WHC-1	Biotite syenite porphyry	101.268	25.3833	40.53	0.38	Zircon U–Pb(LA-ICP-MS)
64	JC-DXC	Syenite porphyry	99.9356	26.5837	35.44	0.72	Zircon U–Pb(LA-ICP-MS)
65	FSL	Granodiorite porphyry	100.818	26.6855	34.52	0.11	Zircon U–Pb(LA-ICP-MS)	Xu Heng. 2016. The Geochemical Characteristics and Petrogenesis of the Prophyries along the Chenghai-Binchuan fault belt, Yunnan province, China (Master dissertation). Kunming University of Science and Technology, Kunming (in Chinese with English abstract).
66		Lamprophyre	100.231	25.2853	33.6	0.29	Zircon U–Pb(LA-ICP-MS)
67	XLT	Monzogranite porphyry	100.677	25.7831	34.73	0.11	Zircon U–Pb(LA-ICP-MS)
68	BJS	Quartz monzonite porphyry	100.231	25.2853	35.6	0.19	Zircon U–Pb(LA-ICP-MS)
69	PM14-15	Monzogranite porphyry	100.42	25.1208	35.5	0.56	Zircon U-Pb(SHRIMP II)	Xu Chao. 2014. The Characteristics and Causes of Monzonite Granite Porphyry in Gejiumu, Nanjian Country, Yunnan (Master dissertation). Chengdu University of Technology, Chengdu (in Chinese with English abstract).
70	XIAO-1	Syenite porphyry	100.408	25.1231	37.91	0.35	Zircon U–Pb(LA-ICP-MS)
71	LLS-76	Monzogranite	98.2667	24.9333	50.39	0.36	Zircon U–Pb(LA-ICP-MS)	Lin Jinzhan. 2013. Geological and geochemical characteristics of Lailishan granites in Tengchong tin belt, western Yunnan, and their relation to mineralization (Master dissertation). China University of Geosciences, Beijing (in Chinese with English abstract).
72	XLT	Quartz monzonite porphyry	100.659	25.775	34.73	0.28	Zircon U–Pb(LA-ICP-MS)	Zhang Xiang. 2015. The geochemistry and chronology of alkali-rick intrusions in Xiaolongtang area, Dali, China (Master dissertation). Kunming University of Science and Technology, Kunming (in Chinese with English abstract).
73	W13	Monzogranite porphyry	100.191	26.1719	36.59	0.61	Zircon U–Pb(LA-ICP-MS)	Jiang Chengzhu. 2014. Potassic Magmatism and Ore-forming Processes of Beiya Gold Deposit in Western Yunnan (Doctor dissertation). China University of Geosciences, Beijing (in Chinese with English abstract).
74	W16	Monzogranite porphyry	100.194	26.1711	37.67	0.97	Zircon U–Pb(LA-ICP-MS)
75	W50	Monzogranite porphyry	100.195	26.1708	35.9	1.2	Zircon U–Pb(LA-ICP-MS)
76	W60	Monzogranite porphyry	100.193	26.1722	35.2	1.8	Zircon U–Pb(LA-ICP-MS)
77	H01	Quartz syenite porphyry	100.19	26.1703	34.84	0.85	Zircon U–Pb(LA-ICP-MS)
78	H03	Quartz syenite porphyry	100.19	26.1708	34.81	0.47	Zircon U–Pb(LA-ICP-MS)
79	W02	Quartz syenite porphyry	100.189	26.1711	35.9	0.58	Zircon U–Pb(LA-ICP-MS)
80	W03	Quartz syenite porphyry	100.193	26.1736	34.72	0.94	Zircon U–Pb(LA-ICP-MS)
81	W09	Quartz syenite porphyry	100.191	26.1731	35	1.4	Zircon U–Pb(LA-ICP-MS)
82	W14	Quartz syenite porphyry	100.193	26.1725	37.2	1.4	Zircon U–Pb(LA-ICP-MS)
83	W44	Quartz syenite porphyry	100.194	26.1714	36.4	1	Zircon U–Pb(LA-ICP-MS)
84	W51	Quartz syenite porphyry	100.194	26.1711	34.6	1.9	Zircon U–Pb(LA-ICP-MS)
85	W52	Quartz syenite porphyry	100.194	26.1708	35.35	0.91	Zircon U–Pb(LA-ICP-MS)
86	W59	Quartz syenite porphyry	100.193	26.1714	35.03	0.86	Zircon U–Pb(LA-ICP-MS)
87	TCX1604	Granite porphyry	103.001	22.7703	34.36	0.39	Zircon U–Pb(LA-ICP-MS)	Wu Jingkai, Zhao Zhidan, Yang Yiyun, Lei Hangshan, Miao Zhuang, Liu Dong, Zhu Dicheng, Yu Xuehui. 2019. Petrogenesis and geological implications of the alkali-rich porphyry in southern Ailaoshan-Red River shear zone. Acta Petrologica Sinica, 35(2): 485-504 (in Chinese with English abstract).
88	BSZ1605	Quartz monzonite porphyry	103.275	22.7439	35.48	0.39	Zircon U–Pb(LA-ICP-MS)
89	LC1605	Syenite porphyry	102.536	22.8586	35.36	0.43	Zircon U–Pb(LA-ICP-MS)
90	FSL	Quartz monzonite porphyry	100.818	26.6855	36	0.2	Zircon U–Pb(LA-ICP-MS)	Zhou Jie. 2017. Study on the Mineralized Intrusion Features and Tectonic Setting of Cu Polymetallic Deposits in the Bishashan-Fenshuiling, Western Yunnan Province (Doctor dissertation). China University of Geosciences, Beijing (in Chinese with English abstract).
91	BJS	Quartz monzonite porphyry	100.379	25.4659	35.6	0.2	Zircon U–Pb(LA-ICP-MS)
92	XLT	Quartz monzonite porphyry	100.657	25.6084	35.9	0.2	Zircon U–Pb(LA-ICP-MS)
93		Diopside granite porphyry	100.154	26.1383	34.1	4	Zircon U-Pb(SHRIMP II)	Liu Hongying, Xia Bin, Zhang Yuquan. 2003. The SHRIMP U-Pb Age of Matouwan Diopside Granite Porphyry in Yunnan Province. Acta Geoscientica Sinica, 24(6): 552-554 (in Chinese with English abstract).
94	BQMP	Biotite quartz monzonite porphyry	102.577	22.9687	36.19	0.22	Zircon U–Pb(LA-ICP-MS)	Zhu Xiangping. 2010. Geological Characteristics and Metallogenesis in Habo Porphyry Cu-Mo-Au Deposit, Yunnan, China (Doctor dissertation). China University of Geosciences, Beijing (in Chinese with English abstract).
95	EH	Granite	102.587	22.9706	35.37	0.48	Zircon U–Pb(LA-ICP-MS)
96	MP	Monzonite porphyry	102.582	22.9659	36.2	0.2	Zircon U–Pb(LA-ICP-MS)
97	BC1501	Granite porphyry	100.367	25.65	34.8	0.3	Zircon U–Pb(LA-ICP-MS)	Zhao Yuanxin. 2017. The Geochronology,Geochemisty of the Jiudingshan and Baofengsi Porphyry in Dali Yunnan (Master dissertation). China University of Geosciences, Beijing (in Chinese with English abstract).
98	XY1518	Granite porphyry	100.433	25.5167	35.3	0.2	Zircon U–Pb(LA-ICP-MS)
99	BC1510	Monzonite porphyry	100.417	25.7667	35.6	0.2	Zircon U–Pb(LA-ICP-MS)
100	BC1513	Monzonite porphyry	100.467	25.7833	34.7	0.6	Zircon U–Pb(LA-ICP-MS)
101	XY1503	Monzonite porphyry	100.5	25.5333	35.3	0.2	Zircon U–Pb(LA-ICP-MS)
102	XY1507	Monzonite porphyry	100.467	25.5333	34.6	0.3	Zircon U–Pb(LA-ICP-MS)
103	T81871	Syenite	99.5966	26.5409	34.8	1.6	Zircon U-Pb(SHRIMP II)	Wan Shaokai, Xia Bin, Zhang Yuquan. 2005. SHRIMP Zircon U-Pb dating of Laojunshan Syenite. Geotectonica et Metallogenia, 29(4): 522-526 (in Chinese with English abstract).
104	TC-78	Monzogranite porphyry	103.053	22.7935	35.1	0.3	Zircon U–Pb(LA-ICP-MS)	Huang Bo, Liang Huaying, Mo Jihai, Xie Yingwen. 2009. Zircon LA-ICP-MS U-Pb Age of the Jinping-Tongchang Porphyry Associated with Cu-Mo Mineralization and its Geological Implication. Geotectonica et Metallogenia, 33(4): 598-602 (in Chinese with English abstract).
105		Lamprophyre	101.294	25.3879	31.22	0.33	Zircon U–Pb(LA-ICP-MS)	Yan QingGao, Guo ZhongLin, Li Chao, Jiang XiaoJun, Wang ZhongQiang, Li YaDong. 2019. Zircon LA-ICP-MS U-Pb geochronology and Hf isotopes of lamprophyre in Gan’gou gold deposit, Yao’an County, Central Yunnan Province. Mineral Deposits, 38(3): 526-540 (in Chinese with English abstract).
106	PM15-06TW	Quartz monzonite porphyry	100.306	25.1979	36.89	0.5	Zircon U-Pb(SHRIMP II)	Li Xueren. 2014. Petrological characteristics and ore potentiality of Lianhuashan alkali-rich porphyry in Weishan, west of Yunnan (Master dissertation). Chengdu University of Technology, Chengdu (in Chinese with English abstract).
107	Y0322-4	Ignimbrite	101.258	25.3812	33.27	0.38	Zircon U-Pb(SHRIMP II)	Yan Qinggao, Jiang Xiaojun, Wu Peng, Sun Huiyi, Guan Shenjin. 2017. Zircon SHRIMP U-Pb geochronology and volcanic edifice division of the Laojiezi intraplate alkali-rich volcanic rocks in Yao’an, central Yunnan province. Acta Geologica Sinica, 91(8): 1743–1759 (in Chinese with English abstract).
108	Y0322-1	Trachytic tuff	101.261	25.3862	33.63	0.5	Zircon U-Pb(SHRIMP II)
109	10WS01-1	Quartz monzonite porphyry	100.237	25.1972	38.5	0.6	Zircon U–Pb(LA-ICP-MS)	Jia Ruya, Liao Shiyong, Liu Zheng, Ye Chunlin. 2016. Petrogenesis and tectonic implications of the Eocene Weishan pluton from western Yunnan. Geology in China, 43(1): 132-141 (in Chinese with English abstract).
110	PM24-12	Granite	100.389	24.9083	33.39	0.47	Zircon U-Pb(SHRIMP II)	Lize. 2014. Material Compisition Characteristics and Tectonic Evolution of the Ailaoshan Tectonic Belt in Nanjian Areas, Yunnan Province (Master dissertation). Chengdu University of Technology, Chengdu (in Chinese with English abstract).
111	LHS11-03	Quartz monzonite porphyry	100.311	25.1985	34.2	0.4	Zircon U–Pb(LA-ICP-MS)	Liu Jinyu, Deng Jun, Li Gongjian, Xiao Changhao, Meng Fujun, Chen Fuchuan, Wu Wei, Zhang Qiwei. 2017. Petrogenesis and tectonic significance of the Lianhuashan intrusion in the Lanping Basin, western Yunnan:Constraints from bulk element composition, zircon U-Pb geochronology and Hf isotopic compositions. Acta Petrologica Sinica, 33(7): 2115-2128 (in Chinese with English abstract).
112	LHS11-05	Quartz monzonite porphyry	100.311	25.1985	34.5	1	Zircon U–Pb(LA-ICP-MS)
113	SZ2	Granite porphyry	99.8028	26.8589	35.6	0.58	Zircon U–Pb(LA-ICP-MS)	Huang Yonggao, Luo Gai, Zhang Tong, Xiong Changli, Jia Xiaochuan, Yang Xuejun. 2018. Characteristics of Chronology and Geochemistry for the Cenozoic Alkali-rich Porphyry in Lijiang Area, Western Yunnan and Their Significance. Geoscience, 32(1): 28-44 (in Chinese with English abstract).
114	LJS3	Syenite	99.6894	26.6647	34.56	0.66	Zircon U–Pb(LA-ICP-MS)
115	LBS1	Trachyte porphyry	99.5689	26.7833	34.74	0.7	Zircon U–Pb(LA-ICP-MS)
116	WLP2	Trachyte porphyry	99.6389	26.6839	37.07	0.92	Zircon U–Pb(LA-ICP-MS)
117	14JP08-1	Diopside syenite porphyry	99.7486	26.6417	35.7	0.1	Zircon U–Pb(LA-ICP-MS)	Shen Yang, Zheng Yuanchuan, Zhang Aiping, Wang Zixuan, Wang Lu, Xu Peiyan, Wu Changda. 2019. Zircon U-Pb geochronology, geochemistry and Sr-Nd-Hf isotopes of the Eocene alkali-rich magmatic rocks in the Jianchuan area of western Yunnan and their implications for petrogenesis. Acta Petrologica Sinica, 35(3): 849-866 (in Chinese with English abstract).
118	16JCS20-1	Granite porphyry	99.7917	26.6167	36.1	0.2	Zircon U–Pb(LA-ICP-MS)
119	14LJS01-1	Granite porphyry	99.7931	26.6147	35.1	0.4	Zircon U–Pb(LA-ICP-MS)
120	16JCS01-1	Hornblende syenite porphyry	99.7369	26.645	35.8	0.4	Zircon U–Pb(LA-ICP-MS)
121	XY1503	Granite porphyry	100.513	25.5446	35.3	0.2	Zircon U–Pb(LA-ICP-MS)	Tong Xin, Zhao Zhidan, Niu Yaoling, Zhang Shuangquan, Cousens Brian, Liu Dong, Zhang Yong, Han Meizhi, Zhao Yuanxin, Lei Hangshan, Shi Qingshang, Zhu Dicheng, Sheikh Lawangin, Lutfi Wasiq. 2019. Petrogenesis and tectonic implications of the Eocene-Oligocene potassic felsic suites in western Yunnan, eastern Tibetan Plateau: Evidence from petrology, zircon chronology, elemental and Sr-Nd-Pb-Hf isot…
122	XY1509	Granite porphyry	100.441	25.5258	34.5	0.2	Zircon U–Pb(LA-ICP-MS)
123	XY1513	Granite porphyry	100.441	25.5258	34.7	0.2	Zircon U–Pb(LA-ICP-MS)
124	XY1518	Granite porphyry	100.436	25.5206	35.3	0.2	Zircon U–Pb(LA-ICP-MS)
125	BC1501	Granite porphyry	100.369	25.654	34.8	0.3	Zircon U–Pb(LA-ICP-MS)
126	BC1505	Granite porphyry	100.369	25.654	35.3	0.2	Zircon U–Pb(LA-ICP-MS)
127	LJ1501	Monzogranite porphyry	99.8227	26.7903	35.5	0.3	Zircon U–Pb(LA-ICP-MS)
128	LJ1504	Monzogranite porphyry	99.7756	26.7814	35.5	0.2	Zircon U–Pb(LA-ICP-MS)
129	LJ1509	Monzogranite porphyry	99.7142	26.7615	35.7	0.2	Zircon U–Pb(LA-ICP-MS)
130	LJ1512	Monzogranite porphyry	99.6951	26.7607	35.6	0.2	Zircon U–Pb(LA-ICP-MS)
131	XQBT02-J	Monzogranite porphyry	99.6989	26.7617	35.4	0.2	Zircon U–Pb(LA-ICP-MS)
132	JC1511	Syenite porphyry	99.9202	26.5839	35.8	0.3	Zircon U–Pb(LA-ICP-MS)
133	HQBT02-J	Syenite porphyry	100.315	26.4713	36	0.7	Zircon U–Pb(LA-ICP-MS)
134	HQBT11-J	Syenite porphyry	100.306	26.4496	34.6	1.1	Zircon U–Pb(LA-ICP-MS)
135	HQBT14-J	Syenite porphyry	100.328	26.4446	36.9	0.4	Zircon U–Pb(LA-ICP-MS)
136	YS-50	Alkali granite massif	103.217	22.9132	35.2	0.4	Titanite U–Pb	Zhang Liansheng, Schiirer Urs. 1999. Age and origin of magmatism along the Cenozoic Red River shear belt, China. Contrib Mineral Petrol, 134: 67-85.
137	YS-50	Alkali granite massif	103.217	22.9132	35	0.3	Titanite and K-feldspar isochron
138	YS-25	Augengneiss	99.2612	27.1078	28.9	0.6	Rb-Sr isochron
139	YS-53	Layered granite	102.04	23.4789	25.8	0.2	Monazite U–Pb
140	YS-13	Layered granite	102.637	23.1431	31.9	0.3	Monazite U–Pb
141	YS-26	Leucogranitic layer	99.2623	27.1154	33.1	0.2	Ti-U-oxide
142	MD-1	Leucogranitic layer	100.172	25.6013	24.7	0.2	Zircon U–Pb
143	L13TC-10	Granite porphyry	103.033	22.8051	35.1	0.3	Zircon U–Pb(MC-ICP-MS)	Chen Bei, Long Xiaoping, Wilde Simon A., Yuan Chao, Wang Qiang, Xia Xiaoping, Zhang Zhaofeng. 2017. Delamination of lithospheric mantle evidenced by Cenozoic potassic rocks in Yunnan, SW China: A contribution to uplift of the Eastern Tibetan Plateau. Lithos, 284-285: 709–729.
144	L13JP-40	High-Mg syenites	102.55	22.9556	34.7	0.4	Zircon U–Pb(MC-ICP-MS)
145	L13JP-20	Low-Mg syenites	103.262	22.7578	35	0.3	Zircon U–Pb(MC-ICP-MS)
146	L13TC-01	Syenite porphyries	103.048	22.8044	34.9	0.3	Zircon U–Pb(MC-ICP-MS)
147	YS1501	Biotite monzonite porphyry	100.937	26.8926	34.29	0.11	Zircon U–Pb(LA-ICP-MS)	Tu Xuejing. 2018. The Geochronology, Geochemistry of the Yongsheng Porphyry in Yunnan Province (Master dissertation). China University of Geosciences, Beijing (in Chinese with English abstract).
148	YS1504	Hornblende monzonite porphyry	100.937	26.892	33.19	0.57	Zircon U–Pb(LA-ICP-MS)
149	YS1505	Hornblende monzonite porphyry	100.937	26.8922	33.72	0.45	Zircon U–Pb(LA-ICP-MS)
150	YS1508	Hornblende monzonite porphyry	100.936	26.8928	34.39	0.36	Zircon U–Pb(LA-ICP-MS)
151	YS1510	Hornblende monzonite porphyry	100.936	26.8925	33.17	0.83	Zircon U–Pb(LA-ICP-MS)
152	LJ1501	Granite porphyry	99.7683	26.7692	35.5	0.2	Zircon U–Pb(LA-ICP-MS)	Han Meizhi. 2017. Alkali-rich porphyry petrology and geochemistry in Jianchuan in Yunnan Province (Master dissertation). China University of Geosciences, Beijing (in Chinese with English abstract).
153	LJ1504	Granite porphyry	99.7819	26.7697	35.5	0.2	Zircon U–Pb(LA-ICP-MS)
154	JC1511	Hornblende syenite porphyry	99.9244	26.59	35.8	0.3	Zircon U–Pb(LA-ICP-MS)
155	JC1515	Quartz monzonite porphyry	99.7967	26.6303	35.4	0.2	Zircon U–Pb(LA-ICP-MS)
156	JC1519	Quartz monzonite porphyry	99.8094	26.6286	36.6	0.4	Zircon U–Pb(LA-ICP-MS)
157	LJ1509	Quartz monzonite porphyry	99.7125	26.7589	35.7	0.2	Zircon U–Pb(LA-ICP-MS)
158	LJ1511	Quartz monzonite porphyry	99.7008	26.7553	35.8	0.4	Zircon U–Pb(LA-ICP-MS)
159	LJ1512	Quartz monzonite porphyry	99.6961	26.7519	35.6	0.2	Zircon U–Pb(LA-ICP-MS)
160	LJ1513	Syenite	99.6875	26.7489	35	0.2	Zircon U–Pb(LA-ICP-MS)
161	ZP15-34	Syenite	99.3842	25.5006	35.19	0.31	Zircon U–Pb(LA-ICP-MS)	Li Tengjian. 2017. Petrogenesis of the Zhuopan alkaline complex in West Yunnan province and its metallogenesis significance (Master dissertation). China University of Geosciences, Beijing (in Chinese with English abstract).
162	SMC-B1	Granite porphyry	100.443	25.5046	36	0.2	Zircon U–Pb(LA-ICP-MS)	Sun Nuo. 2015. The metallogenic model of the typical deposits in Jinsha River—Ailaoshan alkali-rich porphyry belt (Doctor dissertation). China University of Geosciences, Beijing (in Chinese with English abstract).
163	BXC-B4	Granite porphyry	100.441	25.5063	37	0.3	Zircon U–Pb(LA-ICP-MS)
164	77ZK17-1	Quartz syenite porphyry	100.193	26.1703	37	0.3	Zircon U–Pb(LA-ICP-MS)
165	BLC-3	Quartz syenite porphyry	100.191	26.1717	36	0.8	Zircon U–Pb(LA-ICP-MS)
166	HQ1514-J	Pyroxene syenite porphyry	100.312	26.4694	36.89	0.33	Zircon U–Pb(LA-ICP-MS)	Zhang Yong. 2017. Geochronology and Geochemistry of Alkali-rich Porphyries and Its Xenoliths in Liuhe and Xiaoqiaotou, Western Yunnan (Master dissertation). China University of Geosciences, Beijing (in Chinese with English abstract).
167	XQ1502-J	Quartz monzonite porphyry	99.7042	26.7578	35.41	0.18	Zircon U–Pb(LA-ICP-MS)
168	XQ1509-J	Quartz monzonite porphyry	99.7089	26.7681	35.4	0.18	Zircon U–Pb(LA-ICP-MS)
169	LHS-11	Hornblende quartz monzonite porphyry	100.308	25.2044	35.7	0.5	Zircon U–Pb(LA-ICP-MS)	Wang Tao. 2018. Petrogenesis and metallogenesis significance of the Lianhuashan Alkaline-rich Porphyry in Western Yunnan Province (Master dissertation). China University of Geosciences, Beijing (in Chinese with English abstract).
170	LHS-3	Quartz monzonite porphyry	100.288	25.2083	35.6	0.6	Zircon U–Pb(LA-ICP-MS)
171	LHS-5	Quartz monzonite porphyry	100.304	25.1981	35.6	0.5	Zircon U–Pb(LA-ICP-MS)
172	WS-3	Quartz monzonite porphyry	100.312	25.1947	35.2	0.4	Zircon U–Pb(LA-ICP-MS)
173	15ZDS04-2	Monzogranite	101.928	30.0014	18.4	0.1	Zircon U–Pb(LA-ICP-MS)	Tian Yuan. 2018. Petrogenesis and Tectonic Significance of Zheduoshan Miocene Granite, Western Sichuan (Master dissertation). China University of Geosciences, Beijing (in Chinese with English abstract).
174	14ZDS02-1	Monzogranite	101.883	30.0294	18.2	0.2	Zircon U–Pb(LA-ICP-MS)
175	14ZDS04-1	Monzogranite	101.868	30.0417	17.2	0.1	Zircon U–Pb(LA-ICP-MS)
176	14ZDS07-1	Monzogranite	101.848	30.0878	13.3	0.1	Zircon U–Pb(LA-ICP-MS)
177	15ZDS04-1	Monzogranite	101.853	30.1064	13.1	0.1	Zircon U–Pb(LA-ICP-MS)
178	Y83-909	Potassic Alkaline Igneous Rocks	100.009	26.8692	35.6	0.2	Zircon U–Pb(LA-ICP-MS)	Liang Huaying, Campbell Ian H., Allen Charlotte M., Sun Weidong, Yu Hengxiang, Xie Yingweng, Zhang Yuquan. 2007. The age of the potassic alkaline igneous rocks along the Ailaoshan–Red River Shear Zone: implications for the onset age of left-lateral shearing. The Journal of Geology. 115, 231–242.
179	Y81-791	Potassic Alkaline Igneous Rocks	100.086	26.7269	34.5	0.3	Zircon U–Pb(LA-ICP-MS)
180	Y81-862	Potassic Alkaline Igneous Rocks	100.222	26.485	34.4	0.4	Zircon U–Pb(LA-ICP-MS)
181	Y83-634	Potassic Alkaline Igneous Rocks	100.388	26.2389	35.6	0.4	Zircon U–Pb(LA-ICP-MS)
182	Y83-740	Potassic Alkaline Igneous Rocks	100.53	26.2411	35.6	0.6	Zircon U–Pb(LA-ICP-MS)
183	Y83-760	Potassic Alkaline Igneous Rocks	100.436	26.3175	36.3	0.5	Zircon U–Pb(LA-ICP-MS)
184	Y83-803	Potassic Alkaline Igneous Rocks	100.715	25.5267	34.8	0.3	Zircon U–Pb(LA-ICP-MS)
185	Y83-745	Potassic Alkaline Igneous Rocks	100.715	25.5267	35.6	0.5	Zircon U–Pb(LA-ICP-MS)
186	Y81-974	Potassic Alkaline Igneous Rocks	101.334	25.3333	34	0.5	Zircon U–Pb(LA-ICP-MS)
187	Y81-78	Potassic Alkaline Igneous Rocks	103.07	22.8878	35.1	0.3	Zircon U–Pb(LA-ICP-MS)
188	Sh-126	Potassic Alkaline Igneous Rocks	103.289	22.8097	35.4	0.4	Zircon U–Pb(LA-ICP-MS)
189	Y83-620	Potassic Alkaline Igneous Rocks	100.553	25.2128	34.8	0.2	Zircon U–Pb(LA-ICP-MS)
190	LLS-2	Granite	98.2592	24.9206	53	0.2	Zircon U–Pb(LA-ICP-MS)	Chen Xiaocui, Hu Ruizhong, Bi Xianwu, Zhong Hong, Lan Jiangbo, Zhao Chenghai, Zhu Jingjing. 2015. Petrogenesis of metaluminous A-type granitoids in the Tengchong-Lianghe tin belt of southwestern China: Evidences from zircon U-Pb ages and Hf-O isotopes, and whole-rock Sr-Nd isotopes. Lithos, 212-215: 93-110.
191	LLS-6	Granite	98.2792	24.9469	52.7	0.2	Zircon U–Pb(LA-ICP-MS)
192	10DX-54B	Gabbroic rocks	97.6294	24.6252	53.2	0.4	Zircon U–Pb(MC-ICP-MS)	Wang Yuejun, Li Shubo, Ma Liyan, Fan Weiming, Cai Yongfeng, Zhang Yanhua, Zhang Feifei. 2015. Geochronological and geochemical constraints on the petrogenesis of Early Eocene metagabbroic rocks in Nabang (SW Yunnan) and its implications on the Neotethyan slab subduction. Gondwana Research, 27: 1474-1486.
193	10DX-55E	Gabbroic rocks	97.5833	24.6083	53.6	0.7	Zircon U–Pb(MC-ICP-MS)
194	DX-66B	Gneissic granite	97.5792	24.7083	55	0.5	Zircon U–Pb(MC-ICP-MS)	Ma Liyan, Wang Yuejun, Fan Weiming, Geng Hongyan, Cai Yongfeng, Zhong Hong, Liu Huichuan, Xing Xiaowan. 2014. Petrogenesis of the early Eocene I-type granites in west Yingjiang (SW Yunnan) and its implication for the eastern extension of the Gangdese batholiths. Gondwana Research, 25: 401-419.
195	DX-58	Gneissic granite	97.5828	24.6419	51.5	0.8	Zircon U–Pb(MC-ICP-MS)
196	DX-57	Gneissic granite	97.5828	24.6249	52.3	0.8	Zircon U–Pb(MC-ICP-MS)
197	DX-56B	Gneissic granite	97.5859	24.6135	50.3	1.3	Zircon U–Pb(MC-ICP-MS)
198	YJ-2A	Gneissic granite	97.5861	24.6131	53.6	2.9	Zircon U–Pb(MC-ICP-MS)
199	DX-67	Gneissic granite	97.6856	24.5846	51.6	1.1	Zircon U–Pb(MC-ICP-MS)
200	DX-59A	Hornblende-bearinggneissicgranites	97.5844	24.673	54.4	0.7	Zircon U–Pb(MC-ICP-MS)
201	DX-66D	Leucogranite	97.5792	24.7083	52.8	0.3	Zircon U–Pb(MC-ICP-MS)
202	DX-53C	Leucogranite	97.6398	24.6175	53.1	0.2	Zircon U–Pb(MC-ICP-MS)
203	305	Alkali feldspar granite porphyry	97.4056	31.0715	36.9	0.4	Zircon U–Pb(LA-ICP-MS)	Liang Huaying, Mo Jihai, Sun Weidong, Zhang Yuquan, Zeng Ti, Hu Guangqian, Charllote ALLEN. 2008. Study on geochemical composition and isotope ages of the Malasongduo porphyry associated with Cu-Mo mineralization. Acta Petrologica Sinica, 25(2): 385-392 (in Chinese with English abstract).
204	328	Alkali feldspar granite porphyry	97.4062	31.0784	36.9	0.3	Zircon U–Pb(LA-ICP-MS)
205	JDS-16-2	Biotite granite porphyry	100.424	25.5233	35.1	0.2	Zircon U–Pb(LA-ICP-MS)	Lv Xin. 2015. Geochemistry and chronology of copper-molybdenum deposit in Jiudingshan, Yunnan (Master dissertation). Peking University, Beijing (in Chinese with English abstract).
206	JDS-34	Diabase dyke	100.424	25.5239	35.3	0.4	Zircon U–Pb(LA-ICP-MS)
207	JDS-06-2	Granite porphyry	100.424	25.5228	34.7	0.2	Zircon U–Pb(LA-ICP-MS)
208	JDS-21-2	Granite porphyry	100.424	25.5231	34.4	0.3	Zircon U–Pb(LA-ICP-MS)
209	JDS-31	Granite porphyry	100.423	25.5235	34.2	0.2	Zircon U–Pb(LA-ICP-MS)
210	JDS-36-1	Granite porphyry	100.424	25.524	34.8	0.1	Zircon U–Pb(LA-ICP-MS)
211	JDS-27-3	Granite porphyry	100.424	25.5233	34.8	0.2	Zircon U–Pb(LA-ICP-MS)
212	JDS-18	Lamprophyre	100.425	25.5235	34.6	0.3	Zircon U–Pb(LA-ICP-MS)
213	JDS-05-1	Lamprophyre	100.423	25.5236	35.2	0.4	Zircon U–Pb(LA-ICP-MS)
214	JDS-40-1	Monzonite porphyry	100.424	25.5242	34.4	0.2	Zircon U–Pb(LA-ICP-MS)
215	JDS-40-3	Monzonite porphyry	100.424	25.5242	34.2	0.1	Zircon U–Pb(LA-ICP-MS)
216	JDS-07-3	Porphyritic‐like granite	100.426	25.5228	34.1	0.1	Zircon U–Pb(LA-ICP-MS)
217	JDS-10-2	Porphyritic‐like granite	100.427	25.523	34.4	0.1	Zircon U–Pb(LA-ICP-MS)
218	JDS-11	Porphyritic‐like granite	100.426	25.5231	34.7	0.1	Zircon U–Pb(LA-ICP-MS)
219	JDS-37	Porphyritic‐like quartz monzonite	100.427	25.5229	34.5	0.1	Zircon U–Pb(LA-ICP-MS)
220	JDS-38	Porphyritic‐like quartz monzonite	100.428	25.5224	34.3	0.2	Zircon U–Pb(LA-ICP-MS)
221	JDS-33-2	Quartz monzonite porphyry	100.425	25.5237	34.8	0.2	Zircon U–Pb(LA-ICP-MS)
222	DC0835-2	Granite	100.114	25.7014	33.4	1.7	Zircon U–Pb(LA-ICP-MS)	Cao Shuyun, Liu Junlai, Leiss Bernd, Neubauer Franz, Genser Johann, Zhao Chunqiang. 2011. Oligo-Miocene shearing along the Ailao Shan–Red River shear zone: Constraints from structural analysis and zircon U/Pb geochronology of magmatic rocks in the Diancang Shan massif, SE Tibet, China. Gondwana Research, 19: 975-993.
223	DC0822-1	Granite	100.119	25.6722	26.95	0.34	Zircon U–Pb(LA-ICP-MS)
224	DC0835-1	Granite	100.107	25.7044	25.31	0.18	Zircon U–Pb(LA-ICP-MS)
225	DC0810-2	Granitic pegmatite dyke	100.189	25.6128	20.27	0.23	Zircon U–Pb(LA-ICP-MS)
226	DC08-2-2	Granodiorite	100.06	25.625	32.5	1	Zircon U–Pb(LA-ICP-MS)
227	DC0623-1	Monzogranite	100.105	25.6803	30.95	0.61	Zircon U-Pb(SHRIMP II)
228	DC08-2-1	Pegmatite	100.058	25.6203	25.49	0.41	Zircon U–Pb(LA-ICP-MS)
229	DC08-8-5	Pegmatite	100.092	25.6097	22.91	0.19	Zircon U–Pb(LA-ICP-MS)
230	TC7	Dacite	98.5757	25.1987	0.41	0.11	Zircon U-Pb(SHRIMP)	Li Linlin, Wang Shubing, Liu Jianhui, Shi Yuruo. 2015. Age and origin of Mid-Pleistocene volcanic rocks from Qushi in Tengchong area, western Yunnan Province: SHRIMP zircon U-Pb dating and constraint from Hf-in-zircon isotopes. Acta Petrologica Sinica, 31(9): 2609-2619 (in Chinese with English abstract)
231	XSJ-03	Syenogranite	98.1133	25.4258	65	1	Zircon U–Pb(LA-ICP-MS)	Zou Hao, Cao Huawen, Bagas Leon, Zhang Shouting, Zhang Qiang, Zhang Yunhui, Liu Hang, Li Yang. 2019. Origin of the Mo-bearing Xiaoshuijing Syenogranite in the Tengchong Terrane, SW China. Ore Geology Reviews, 105: 258–272.
232	EC-01	monzonite porphyry	102.582	22.9657	34.54	0.63	Zircon U–Pb(LA-ICP-MS)	Xia Bin, Lu Ye, Yuan Yajuan, Chen Weiyan, Zhang Xiao, Xu Chi, Yu Shengrui, Wang Zhifeng. 2018. Mixing of Enriched Lithospheric Mantle-Derived and Crustal Magmas: Evidence from the Habo Cenozoic Porphyry in Western Yunnan. Acta Geologica Sinica (English Edition), 92(5): 1753-1768.
233	ZC-02	Syenite porphyry	102.582	22.9659	35.25	0.51	Zircon U–Pb(LA-ICP-MS)
234	LLST105	Granite	98.2656	24.9369	50.6	0.2	Zircon U–Pb(MC-ICP-MS)	Cao Huawen, Pei Qiuming, Zhang Souting, Zhang Linkui, Tang Li, Lin Jinzhan, Zheng Luo. 2017. Geology, geochemistry and genesis of the Eocene Lailishan Sn deposit in the Sanjiang region, SW China. Journal of Asian Earth Sciences, 137: 220–240.
235	LLSS36	Granite	98.2656	24.9369	50.2	0.2	Zircon U–Pb(MC-ICP-MS)
236	XQ-47	Biotite granite	98.3244	25.0431	62.9	1.9	Zircon U–Pb(LA-ICP-MS)	Zhou Xinping, Qi Huawen, Hu Ruizhong, Bi Xianwu, Meng Yumiao. 2015. Geochronology and geochemistry of granites in the Tengchong Xinqi area, Western Yunnan and their tectonic implication. Bull. Bulletin of Mineralogy, Petrology and Geochemistry, 34(1): 139–148 (in Chinese with English abstract).
237	XQ-2	Monzogranite	98.2453	25.0889	61.9	1.4	Zircon U–Pb(LA-ICP-MS)
238	6-12-1	Felsic veins	97.6117	24.6417	43.7	0.4	Zircon U–Pb(LA-ICP-MS)	Xu Zhiqin, Wang Qin, Cai Zhihui, Dong Hanwen, Li Huaqi, Chen Xijie, Duan Xiangdong, Cao Hui, Li Jing, Burg Jean-Pierre. 2015. Kinematics of the Tengchong Terrane in SE Tibet from the late Eocene to early Miocene: Insights from coeval mid-crustal detachments and strike-slip shear zones. Tectonophysics, 665: 127-148.
239	6-12-2	Felsic veins	97.5958	24.6314	40.5	0.2	Zircon U–Pb(LA-ICP-MS)
240	7-10-2	Foliated granite	98.3867	24.3628	50.5	0.6	Zircon U–Pb(LA-ICP-MS)
241	28-7-4	Foliated granite	98.4989	24.5828	55	0.5	Zircon U–Pb(LA-ICP-MS)
242	4-4-9	Hornblende-bearing granite gneiss	97.6044	24.6567	53.5	0.5	Zircon U–Pb(LA-ICP-MS)
243	4-5-5	Hornblende-bearing granite gneiss	97.6086	24.6294	53.8	0.7	Zircon U–Pb(LA-ICP-MS)
244	27-6-3	Undeformed felsic vein	98.34	24.3217	35.4	0.5	Zircon U–Pb(LA-ICP-MS)
245	09QG-120	Gneissic granodiorite	97.5894	24.7078	19.7	0.4	Zircon U-Pb(SHRIMP)	Qi Xuexiang, Zhu Luhua, Grimmer Jens C., Hu Zhaocuo. 2015. Tracing the Transhimalayan magmatic belt and the Lhasa block southward using zircon U–Pb, Lu–Hf isotopic and geochemical data: Cretaceous-Cenozoic granitoids in the Tengchong block, Yunnan, China. Journal of Asian Earth Sciences, 110: 170-88.
246	09QG-50	Granite	98.195	25.2306	65.3	1	Zircon U-Pb(SHRIMP)
247	09QG-55	Granite	98.2006	25.2306	64.9	0.9	Zircon U-Pb(SHRIMP)
248	09QG-60	Granite	98.2125	25.3083	64.8	0.7	Zircon U-Pb(SHRIMP)
249	10QTN-39	Granite	97.7381	24.6119	65	1.1	Zircon U–Pb(LA-ICP-MS)
250	DSD-1	Quartz monzonite porphyry	100.161	26.1206	36.72	0.25	Zircon U–Pb(LA-ICP-MS)	Liu Bo, Liu Huan, Zhang Changqing, Mao Zhihao, Zhou Yunman, Huang Hua, He Zhonghua, Su Guangsheng. 2015. Geochemistry and geochronology of porphyries from the Beiya gold–polymetallic orefield, western Yunnan, China. Ore Geology Reviews, 69: 360–379.
251	WGP-1	Quartz monzonite porphyry	100.162	26.1208	35.18	0.22	Zircon U–Pb(LA-ICP-MS)
252	BLC-1	Quartz monzonite porphyry	100.162	26.1206	34.62	0.25	Zircon U–Pb(LA-ICP-MS)
253	MTW-1	Quartz monzonite porphyry	100.162	26.1207	35.12	0.13	Zircon U–Pb(LA-ICP-MS)
254	WDS82ZK6-1	Quartz syenite porphyry	100.161	26.1209	35	0.17	Zircon U–Pb(LA-ICP-MS)
255	HNT-1-1	Quartz syenite porphyry	100.161	26.1206	35.06	0.16	Zircon U–Pb(LA-ICP-MS)
256	BJS31ZK14-3	Quartz syenite porphyry	100.161	26.1207	35.21	0.19	Zircon U–Pb(LA-ICP-MS)
257	D0137	Monzogranite	98.3692	24.4369	51.4	0.4	Zircon U–Pb(LA-ICP-MS)	Gao Yongjuan, Lin Shiliang, Cong Feng, Xie Tao, Tang Fawei, Li Zaihui, Liang Ting. 2014. Zircon U-Pb geochronology, zircon Hf isotope and bulk geochemistry of Paleogene granite in the Tengchong-Lianghe Area, Western Yunnan. Acta Geologica Sinica, 88(1): 63–71 (in Chinese with English abstract).
258	DX-62L	Amphibolite	97.5641	24.7519	55.3	2.1	Zircon U–Pb(LA-ICP-MS)	Wang Yuejun, Zhang Limin, Cawood Peter A., Ma Liyan, Fan Weiming, Zhang Aimei, Zhang Yuzhi, Bi Xianwu. 2014. Eocene supra-subduction zone mafic magmatism in the Sibumasu Block of SW Yunnan: Implications for Neotethyan subduction and India–Asia collision. Lithos, 206-207: 384-399.
259	DX-59	Metabasic rock	97.5844	24.673	55	1	Zircon U–Pb(LA-ICP-MS)
260	DX-64A	Metagabbro	97.5641	24.7519	50.2	0.5	Zircon U–Pb(LA-ICP-MS)
261	DX-55B	Metagabbro	97.5833	24.6083	54.4	1.1	Zircon U-Pb(SIMS)
262	DX-54J	Metagabbro	97.6294	24.6252	54	0.5	Zircon U–Pb(LA-ICP-MS)
263	DX-78C	Metagabbro	97.8257	24.1244	53.1	0.4	Zircon U–Pb(LA-ICP-MS)
264	DX-80C	Metagabbro	97.8453	24.0973	50.1	0.6	Zircon U-Pb(SIMS)
265	TC-26-1	Silicified fractured syenogranite	98.5049	25.221	48	0.4	Zircon U–Pb(LA-ICP-MS)	Lin Musen, Peng Songbai, Qiao Weitao, Li Hhui. 2014. Petro–geochemistry and geochronology of late Cretaceous-Eocene granites in high geothermal anomaly areas in the Tengchong block, Yunnan Province, China and their tectonic implications. Acta Petrologica Sinica, 30(2): 527–546 (in Chinese with English abstract).
266	TC-26-2	Silicified fractured syenogranite	98.5049	25.221	48	0.5	Zircon U–Pb(LA-ICP-MS)
267	TC-XH-2	Ultramylonitized biotite monzogranite	98.4887	24.7518	48	0.9	Zircon U–Pb(LA-ICP-MS)
268	TC-XH-3	Ultramylonitized biotite monzogranite	98.4887	24.7518	46	1	Zircon U–Pb(LA-ICP-MS)
269	LLS	Syenite granite	98.2689	24.9097	52.53	0.29	Zircon U–Pb(LA-ICP-MS)	Jin Canhai, Fan Wenyu, Zhang Hai, Zhang Yu, Shen Zhanwu. 2013. LA–ICP–MS zircon U-Pb dating of Syenite granite in the Lailishan tin deposit of Western Yunnan Province and its geological significance. Acta Geologica Sinica, 87(9): 1211–1220 (in Chinese with English abstract).
270	AL36-1	Biotite monzonite	97.6952	24.5893	55	0.6	Zircon U–Pb(LA-ICP-MS)	Wang Fang, Liu Fulai, Liu Pinghua. 2013. Multiple granitic magma events in Sanjiang complex belt, Yunnan Province: implications for tectonic evolution. Acta Petrologica Sinica, 29(6): 2141-2160 (in Chinese with English abstract).
271	YJ16-1	Granodiorite	97.7411	24.0097	38	0.5	Zircon U–Pb(LA-ICP-MS)
272	WDS11-40	Altered monzogranite porphyry	100.162	26.1197	36.7	0.3	Zircon U–Pb(LA-ICP-MS)	He Wenyan, Mo Xuanxue, Yang Liqiang, Xing Yanlu, Dong Guochen, Yang Zhen, Gao Xue, Bao Xinshang. 2016. Origin of the Eocene porphyries and mafic microgranular enclaves from the Beiya porphyry Au polymetallic deposit, western Yunnan, China: Implications for magma mixing/mingling and mineralization. Gondwana Research, 40: 230–248.
273	WDS13-2	Altered monzogranite porphyry	100.162	26.1197	36.7	0.2	Zircon U–Pb(LA-ICP-MS)
274	WDS14-6	Mafic microgranular enclave	100.162	26.1197	35.9	0.4	Zircon U–Pb(LA-ICP-MS)
275	WDS14-9	Mafic microgranular enclave	100.162	26.1197	36.2	0.7	Zircon U–Pb(LA-ICP-MS)
276	WDS11-1	Monzogranite porphyry	100.161	26.1197	36.3	0.1	Zircon U–Pb(LA-ICP-MS)
277	55ZK31-1	Monzogranite porphyry	100.161	26.1194	36.6	0.4	Zircon U–Pb(LA-ICP-MS)
278	MTW10-1	Monzogranite porphyry	100.161	26.1194	36.4	0.6	Zircon U–Pb(LA-ICP-MS)
279	NDP10-1	Monzogranite porphyry	100.159	26.1194	36	0.5	Zircon U–Pb(LA-ICP-MS)
280	W13	Granitic porphyry	100.197	26.1692	36.59	0.61	Zircon U–Pb(LA-ICP-MS)	Deng Jun, Wang Qingfei, Li Gongjian, Hou Zengqian, Jiang Chengzhu, Danyushevsky Leonid. 2015. Geology and genesis of the giant Beiya porphyry-skarn gold deposit, northwestern Yangtze block, China. Ore Geology Reviews, 70, 457-485.
281	W16	Granitic porphyry	100.198	26.1692	37.03	0.61	Zircon U–Pb(LA-ICP-MS)
282	W02	Monzogranite porphyry	100.196	26.1669	35.9	0.58	Zircon U–Pb(LA-ICP-MS)
283	W03	Monzogranite porphyry	100.196	26.1669	34.72	0.94	Zircon U–Pb(LA-ICP-MS)
284	W09	Monzogranite porphyry	100.193	26.1681	34.68	0.82	Zircon U–Pb(LA-ICP-MS)
285	W14	Monzogranite porphyry	100.198	26.1692	36.64	0.67	Zircon U–Pb(LA-ICP-MS)
286	W44	Monzogranite porphyry	100.191	26.17	36.29	0.68	Zircon U–Pb(LA-ICP-MS)
287	W50	Monzogranite porphyry	100.193	26.1706	35.72	0.58	Zircon U–Pb(LA-ICP-MS)
288	W52	Monzogranitic porphyry	100.193	26.1708	35.38	0.59	Zircon U–Pb(LA-ICP-MS)
289	W59	Potassic-altered granitic porphyry	100.195	26.1689	35.54	0.83	Zircon U–Pb(LA-ICP-MS)
290	W60	Potassic-altered granitic porphyry	100.196	26.1689	34.95	0.75	Zircon U–Pb(LA-ICP-MS)
291	NQ05-3	Monzogranitic porphyry	96.3917	32.2972	39.6	0.3	Zircon U–Pb(LA-ICP-MS)	Xu Yue, Bi Xianwu, Hu Ruizhong, Chen Youwei, Liu Heqing, Xu Lei-luo. 2016. Geochronology and geochemistry of Eocene potassic felsic intrusions in the Nangqian basin, eastern Tibet: Tectonic and metallogenic implications. Lithos, 246-247: 212-227.
292	NQ01-1	Monzogranitic porphyry	96.4953	32.1683	37.4	0.3	Zircon U–Pb(LA-ICP-MS)
293	NQ02-2	Monzogranitic porphyry	96.4578	32.3125	38.1	0.3	Zircon U–Pb(LA-ICP-MS)
294	BZ06-1	syenite porphyries	96.4933	32.0856	35.6	0.3	Zircon U–Pb(LA-ICP-MS)
295	X-79-2	Pseudoleucite porphyry	101.275	25.3911	34.1	0.3	Zircon U–Pb(LA-ICP-MS)	Sun Chundi, Wu Peng, Wang Die, Guan Shenjin, Jiang Xiaojun, Jiang Longyan, Wang Longyan. 2017. Geochemistry and zircon U-Pb age of the Yao'an pseudoleucite porphyry,Yunnan Province,China. Acta Geochimica, 36: 194-206.
296	AL09209-1	Amphibole-bearing biotite plagioclase granitic mylonite	102.622	23.1042	35.72	0.35	Zircon U–Pb(LA-ICP-MS)	Liu Junlai, Chen Xiaoyu, Wu Wenbin, Tang Yuan, Tran My-Dung, Nguyen Quang-Luat, Zhang Zhaochong, Zhao Zhidan. 2015. New tectono-geochronological constraints on timing of shearing along the Ailao Shan-Red River shear zone: Implications for genesis of Ailao Shan gold mineralization. Journal of Asian Earth Sciences, 103: 70-86.
297	AL09106-1	Amphibole-bearing monzo-granitic mylonite	101.761	23.7742	36	0.3	Zircon U–Pb(LA-ICP-MS)
298	CH-3	amphibole-bearing syenite porphyry	102.88	22.8008	35.6	0.3	Zircon U–Pb(LA-ICP-MS)
299	AL0866-2	Biotite monzo-granitic dyke	102.692	23.2086	27.7	1	Zircon U–Pb(LA-ICP-MS)
300	AL0841-4	Granite pegmatite	102.365	23.2953	23.05	0.41	Zircon U–Pb(LA-ICP-MS)
301	AL09106-3	Leucogranite	101.758	23.7758	24.86	0.3	Zircon U–Pb(LA-ICP-MS)
302	AL08127	syenite	103.087	22.7717	35.5	0.3	Zircon U–Pb(LA-ICP-MS)
303	HNT	Quartz syenite porphyry	100.179	26.1556	36.07	0.43	Zircon U–Pb(LA-ICP-MS)	Fu Yu, Sun Xiaoming, Lin Hai, Zhou Haoyang, Li Xin, Ouyang Xianqing, Jiang Liyi, Shi Guiyong, Liang Yeheng. 2015. Geochronology of the giant Beiya gold-polymetallic deposit in Yunnan province, southwest China and its relationship with the petrogenesis of alkaline porphyry. Ore Geology Reviews, 71, 138-149.
304	ALSJ1615-4-1	Granitic dyke	101.924	23.5236	27.09	0.48	Zircon U–Pb(LA-ICP-MS)	Chen Wei, Liu Junlai, Fan Wenkui, Feng Jia, Yan Jiaxin, Dao Hainan. 2018. Multiple stages of granitic dykes along the Ailao Shan-Red River shear zone: Constraints on timing of switch of shear strain types.. Acta Petrologica Sinica, 34(5): 1347-1358 (in Chinese with English abstract).
305	ALSJ1615-3	Granitic dyke	101.926	23.5253	25.17	0.23	Zircon U–Pb(LA-ICP-MS)
306	ALSJ1615-5	Granitic dyke	101.936	23.5286	25.16	0.5	Zircon U–Pb(LA-ICP-MS)
307	DX030-6	Trachydacite	99.7572	26.5444	36.59	0.67	Zircon U–Pb(LA-ICP-MS)	Yang Tiannan, Liang Mingjuan, Fan Junwei, Shi Pengliang, Zhang Hongrui, Hou Zengqian. 2014. Paleogene sedimentation, volcanism, and deformation in eastern tibet: evidence from structures, geochemistry, and zircon u–pb dating in the jianchuan basin, sw china. Gondwana Research, 26: 521-535.
308	DX039-5	Volcanoclastic	99.7556	26.545	35	2.3	Zircon U–Pb(LA-ICP-MS)
309	LCI-01	Granitoid	98.415	25.4652	45	1	Zircon U-Pb(SHRIMP)	Chen Yongqing, Huang Jingning, Zhai Xiaoming, Lu Yingxiang, Cheng Zhizhong, Li Jianrong. 2009. Zircon U-Pb Age and Geochemistry of Granitoids Within Jinla Pb-Zn-Ag Poly-metallic Ore Field Across China and Myanmar Border. Earth Science Frontiers, 16: 344-362.
310	MLI-02	Granitoid	98.3763	25.4646	45	1	Zircon U-Pb(SHRIMP)
311	NLI-02	Granitoid	98.4547	25.4883	43.41	0.78	Zircon U-Pb(SHRIMP)
312		Granite porphyry	99.7403	22.7536	44.6	1.1	Zircon U-Pb(SHRIMP)
313	TCKZ13006-3x	Hornblende dacite	98.4927	25.1806	0.689	0.023	Zircon U-Pb(SIMS)	Ding Leilei, Liu Jiaqi, Guo Zhengfu, Zhang Lei. 2018. The eruption trigger of the dacitic magma in Tengchong during the Middle Pleistocene. Acta Petrologica Sinica, 34(1): 113-125 (in Chinese with English abstract)
314	TCKZ13011-20x	Pyroxene dacite	98.4927	25.1806	0.602	0.036	Zircon U-Pb(SIMS)
315	ZK801-266	Biotite monzogranite porphyry	94.8664	33.4939	62.1	0.4	Zircon U–Pb(LA-ICP-MS)	Hao Jinhua. 2011. Geological Characteristics and Metallogenic Regularities of Northern Sanjiang Porphyries Mo(-Cu) ore belt, southern Qinghai (Doctor dissertation). China University of Geosciences, Beijing (in Chinese with English abstract).
316	ZK2401-251	Leucogranite porphyry	94.8606	33.4942	61.7	0.3	Zircon U–Pb(LA-ICP-MS)
317	ZK004	Porphyry	94.7824	33.5363	43.4	0.4	Zircon U–Pb(LA-ICP-MS)
318	ZK805	Porphyry	94.7807	33.5301	42.9	0.3	Zircon U–Pb(LA-ICP-MS)
319	AL08149-1	Biotite granitic mylonite	103.225	22.9242	30.9	0.7	Zircon U–Pb(LA-ICP-MS)	Tang Yuan, Liu Junlai, Tran My-Dung, Song Zhijie, Wu Wenbin,Zhang Zhaochong, Zhao Zhidan, Chen Wen. 2013. Timing of left-lateral shearing along the Ailao Shan-Red River shear zone: constraints from zircon U–Pb ages from granitic rocks in the shear zone along the Ailao Shan Range, Western Yunnan, China. International Journal of Earth Sciences, 102: 605-626.
320	AL0841-8	Biotite plagioclase granitic dyke	102.425	23.2777	21.8	1	Zircon U–Pb(LA-ICP-MS)
321	AL09213-1	Granitic mylonite	102.751	23.0751	36.6	0.1	Zircon U–Pb(LA-ICP-MS)
322		Biotite monzogranite	98.3856	24.4625	58.29	0.44	Zircon U–Pb(LA-ICP-MS)	Zou Guangfu, Mao Ying, Zou Xin, Lin Shiliang, Cong Feng, Li Zaihui, Xie Tao, Gao Yongjuan. 2013. Zircon U-Pb Age and Geochemistry of Jiangdong Intrusion and Its Implications in the Mangshi, Western Yunnan. Acta Geologica Sinica, 87(11): 1635-1646 (in Chinese with English abstract).
323		K-feldspar granite	98.2917	24.4375	60.8	0.8	Zircon U–Pb(LA-ICP-MS)
324	D4160	K-feldspar granite	98.4451	24.532	60.7	0.6	Zircon U–Pb(LA-ICP-MS)	Xie Tao, Lin Shiliang, Cong Feng, Li Zaihui, Zou Guangfu, Li Junmin, Liang Ting. 2010. LA-ICP-MS Zircon U-Pb Dating for K-feldspar Granites in Lianghe Region, Western Yunnan and Its Geological Significance. Geotectonica et Metallogenia, 34(3), 419-428 (in Chinese with English abstract).
325		Quartz syenite porphyry	100.197	26.1433	36.48	0.26	Zircon U–Pb(LA-ICP-MS)	He Wenyan, Mo Xuanxue, Yu Xuehui, He Zhonghua, Dong Guochen, Liu Xiaobo, Su Gangsheng, Huang Xiongfei. 2013. Zircon U-Pb and molybdenite Re-Os dating for the Beiya gold-polymetallic deposit in the western Yunnan Province and its geological significance. Acta Petrologica Sinica, 29(4): 1301-1310 (in Chinese with English abstract).
326	RL3	Gneissic granite	97.8346	24.1142	56.9	1.5	Zircon U-Pb(SHRIMP)	Shi Yuruo, Wu Zhonghai, Alfred KRONER, Fan Taoyuan, Yang Zhenyu. 2015. Age and Origin of Paleogene Granitoids from Western Yunnan Province, China: Geochemistry, SHRIMP Zircon Ages, and Hf-in-Zircon Isotopic Compositions. Acta Geologica Sinica (English Edition), 89(5), 1601-1615.
327	SD011	Granite	99.4029	25.2754	44.7	0.6	Zircon U-Pb(SHRIMP)
328	SD012-1	Granite	99.7204	24.9046	50.7	0.9	Zircon U-Pb(SHRIMP)
329	SD012-2	Granite	99.7233	24.9132	50.7	2.2	Zircon U-Pb(SHRIMP)
330	SDL-1	Granite	98.6757	24.6403	57	1.3	Zircon U-Pb(SHRIMP)
331	SD025-2	Granite	98.5862	24.5155	34.1	0.6	Zircon U-Pb(SHRIMP)
332	SD002	Granite porphyry	100.436	25.522	35.2	0.6	Zircon U-Pb(SHRIMP)
333	SD029-6	Porphyritic diorite dike	98.2129	24.7902	50	1	Zircon U-Pb(SHRIMP)
334	AL-4	Granitic gneiss	101.541	24.0259	37.52	0.67	Zircon U-Pb(SHRIMP)	Li Baolong, Ji Jianqing, Wang Dandan, Gong Junfeng, Ma Zongjin. 2014. Determination of Eocene–Oligocene (30–40 Ma) deformational time by zircon U–Pb SHRIMP dating from leucocratic rocks in the Ailao Shan–Red River shear zone, southeast Tibet, China. International Geology Review, 56(1): 74-87.
335	SM07-3	Leucogranitic dike	101.916	23.5564	30.8	0.3	Zircon U-Pb(SHRIMP)
336	BZ03-3	Latite	96.4514	32.1556	39.6	0.3	Zircon U–Pb(LA-ICP-MS)	Xu Y., Zhu J.J., Hu R.Z., Bi X.W., Yu H.J., Xu L.L., Liu B.H., Huang M.L., Sheng X.Y., 2019. Heterogeneous lithospheric mantle beneath the southeastern Tibetan Plateau: Evidence from Cenozoic high-Mg potassic volcanic rocks in the Jinshajiang–Ailaoshan Cenozoic magmatic belt. Journal of Asian Earth Sciences, 180: 103849.
337	BZ05-1	Potassic trachybasalt	96.5069	32.0508	38.2	0.3	Zircon U–Pb(LA-ICP-MS)
338	BZ04-2	Shoshonite	96.5583	32.1125	40.1	0.3	Zircon U–Pb(LA-ICP-MS)
339	JDS01-5、JDS02-27	Ore-related granite porphyry	100.436	25.5211	37.5	4.1	Titanite U–Pb(LA-ICP-MS)	Fu Yu, Sun Xiaoming, Hollingsd Pete, Li Dengfeng, Yang Tianjian. 2018. Geochronology and trace element geochemistry of titanite in the Machangqing Cu-Mo-dominated polymetallic deposit, Yunnan Province, southwest China. Journal of Asian Earth Sciences, 158: 398–414.
340	W300	Ore-related porphyry	100.19	26.1764	36	5.9	Titanite U–Pb(LA-ICP-MS)	Fu Yu, Sun Xiaoming, Zhou Haoyang, Lin Hai, Yang Tianjian. 2016. In-situ LA–ICP–MS U–Pb geochronology and trace elements analysis of polygenetic titanite from the giant Beiya gold-polymetallic deposit in Yunnan Province, Southwest China. Ore Geology Reviews, 77: 43-56.
341	Y2-1	Monzogranite porphyry	97.7844	31.3639	38.86	0.8	Zircon U-Pb(SHRIMP)	Jiang Yaohui, Jiang Shaoyong, Ling Hongfei, Dai Baozhang. 2006. Low-degree melting of a metasomatized lithospheric mantle for the origin of cenozoic Yulong monzogranite-porphyry, east Tibet: geochemical and Sr–Nd–Pb–Hf isotopic constraints. Earth & Planetary Science Letters, 241(3-4), 617-633.
342	LDS906	Granite porphyry	100.437	25.5269	36.2	0.3	Zircon U–Pb(LA-ICP-MS)	Xu Leiluo, Bi Xianwu, Hu Ruizhong, Zhang Xingchun, Su Wenchao, Qu Wenjun, Hu Zhaochu, Tang Yongyong. 2012. Relationships between porphyry Cu–Mo mineralization in the jinshajiang–red river metallogenic belt and tectonic activity: constraints from zircon U-Pb and molybdeniteRe-Os geochronology. Ore Geology Reviews, 48: 460–473.
343	YL912	Monzogranite porphyry	97.779	31.36	43.2	0.3	Zircon U–Pb(LA-ICP-MS)
344	TC920	Quartz syenite porphyry	103.055	22.7988	35.8	0.2	Zircon U–Pb(LA-ICP-MS)
345	CA910	Quartz syenite porphyry	102.963	22.8253	36.3	0.3	Zircon U–Pb(LA-ICP-MS)
346	px151	Monzogranite	101.389	26.0623	34.2	0.2	Zircon U–Pb(LA-ICP-MS)	Ding Huixia, Hou Qingye, Zhang Zeming. 2016. Petrogenesis and tectonic significance of the Eocene adakite-like rocks in western Yunnan, southeastern Tibetan Plateau. Lithos, 245: 161–173.
347	px154	Monzogranite	101.379	26.0658	34.1	0.3	Zircon U–Pb(LA-ICP-MS)
348	px31	Quartz monzonite	100.982	27.4307	35.6	0.2	Zircon U–Pb(LA-ICP-MS)
349	px34	Quartz monzonite	100.982	27.4307	35	0.2	Zircon U–Pb(LA-ICP-MS)
350	px137	Biotite granite porphyry	101.152	26.6429	37.39	0.33	Zircon U–Pb(LA-ICP-MS)	Ding Huixia, Hou Qingye, Cao Tiening, Liu Dongsheng, Huang Dingling,Wang Xinyu, Zhu Luoting. 2012. Geochronology, geochemistry and geological significance of Yinchangping granite porphyry, Yunnan province. Earth Science Frontiers 19, 240–251 (in Chinese with English abstract).
351	T803-11	porphyry	94.7819	33.535	43.6	0.5	Zircon U-Pb(SHRIMP)	Yang Zhiming, Hou Zengqian, Xu Jifeng, Bian Xiongfei, Wang Guiren, Yang Zhusen, Tian Shihong, Liu Yingchao, Wang Zhaolin. 2014. Geology and origin of the post-collisional narigongma porphyry Cu–Mo deposit, southern Qinghai, Tibet. Gondwana Research, 26(2): 536-556.
352	N013-1	Quartz diorite porphyry	94.7811	33.5314	41.7	0.5	Zircon U-Pb(SHRIMP)
353	T1201	Porphyry	94.7814	33.5325	43.3	0.5	Zircon U-Pb(SHRIMP)	Yang Zhiming, Hou Zengqian, Yang Zhusen, Wang Shuxian, Wang Guiren, Tian Shihong, Wang Zhaolin, Liu Yingchao. 2008. Genesis of porphyries and tectonic controls on the Narigongma porphyry Mo (Cu) deposit, southern Qinghai. Acta Petrologica Sinica 24, 489–502 (in Chinese with English abstract).
354		Granite porphyry	100.43	25.5005	35	0.2	Zircon U–Pb(ELA-ICP-MS)	Liang Huanying, Xie Yingwen, Zhang Yuquan. 2004. The Formation and Evolution of Potass-rich Alkaline Rock—A case study of Machang Copper Deposit. Progress in Natural Science, 14(1): 116-120 (in Chinese).
355		Hornblende syenite	100.43	25.5009	35.6	0.3	Zircon U–Pb(ELA-ICP-MS)
356	HL1	Diopside syenite porphyry	100.334	26.4042	38	1.5	Zircon U-Pb(SHRIMP)	Xia Bin, Geng Qingrong, Zhang Yuquan. 2007. Zircon SHRIMP U-Pb age of diopside syenite-porphyry at Liuhe, Heqing, western Yunnan, China. Geological Bulletin of China, 26(6): 692-697 (in Chinese with English abstract).
357	TY-1	Quartz syenite porphyry	100.24	26.2106	31.5	1.1	Zircon U-Pb(SHRIMP)	Xiao Xiaoniu, Yu Xuehui, Mo Xuanxue, Yang Guilai, Li Yong, Huang Xingkai. 2009. Geochemistry, zircon SHRIMP U-Pb dating and origin of alkali-rich porphyries in Beiya area, north Erhai Lake, western Yunnan, China. Geological Bulletin of China, 28(12): 1786-1803 (in Chinese with English abstract).
358	TY-3	Quartz syenite porphyry	100.229	26.2403	31.34	0.73	Zircon U-Pb(SHRIMP)
359	DC21	Porphyritic‐like monzonite granite	100.064	25.6838	30.88	0.32	Zircon U-Pb(SHRIMP)	Cao Shuyun, Liu Junlai, Bernd LEISS, Axel VOLLBRECHT, Zou Yunxin, Zhao Chunqiang. 2009. Timing of Initiation of Left-Lateral Slip along the Ailao Shan-Red River Shear Zone: Microstructural, Texture and Thermochronological Evidence from High Temperature Mylonites in Diancang Shan, SW China. Acta Geologica Sinica, 83(10): 1388-1400 (in Chinese with English abstract).
360	10HH-76	Amphibolite	102.817	23.1808	25.51	0.84	Zircon U-Pb(SIMS)	Guo Xiaofei. 2017. Magmatic and metamorphic records of the Ailaoshan tectonic belt since Cretaceous and their tectonic implications (Doctor dissertation). Guangzhou Institute of Geochemistry, Chinese Academy of Sciences, Guangzhou (in Chinese with English abstract).
361	11ML-24B	Granite	101.681	23.7268	31	0.5	Zircon U–Pb(LA-ICP-MS)
362	10HH-121	Granitic gneiss	101.919	23.5553	22.9	1.1	Zircon U–Pb(LA-ICP-MS)
363	10HH-103	Hornblende monzonite	102.432	23.2865	28.9	0.5	Zircon U–Pb(LA-ICP-MS)
364	10HH-105B	Migmatite Leucogranite vein	102.416	23.3096	26.8	0.5	Zircon U–Pb(LA-ICP-MS)
365	10HH-26B	Migmatite Leucogranite vein	103.323	22.996	25.8	0.4	Zircon U–Pb(LA-ICP-MS)
366	10HH-99B	Mylonitized deformed granite	102.409	23.2386	26.2	0.5	Zircon U–Pb(LA-ICP-MS)
367	10HH-117	Mylonitized granodiorite	101.963	23.5824	24.7	1.3	Zircon U–Pb(LA-ICP-MS)
368	JLGLM	Granite porphyry	98.9357	23.3381	40.9	0.9	Zircon U-Pb(SHRIMP)	Yu Xuehui, Xiao Xiaoniu, Yang Guilai, Mo Xuanxue, Zeng Pusheng, Wang Jinlu. 2008. Zircon SHRIMP dating of several granites and geological significance in southern part of Sanjiang area, western Yunnan province. Acta Geologica Sinica, 24(2): 377-383 (in Chinese with English abstract).
369	MHPDBM	Granodiorite	98.9921	23.3572	40.3	0.8	Zircon U-Pb(SHRIMP)
370	JCPD2402-5	Granodiorite	98.9661	23.3601	40	0.8	Zircon U-Pb(SHRIMP)
371	YJ3	Diopside granite	99.7944	26.6286	38.3	2.9	Zircon U-Pb(SHRIMP)	Xia Bin, Lin Qingcha, Zhang Yuquan. 2005. Zircon SHRIMP dating of diopside granite in Ailaoshan-Jinshanjiang rock belt and its geological implications. Geotectonica et Metallogenia, 29(1): 35-43 (in Chinese with English abstract).
372	YDM	Diopside granite	100.154	26.1383	34.1	4	Zircon U-Pb(SHRIMP)
373	126	Diopside granite	103.266	22.7626	36.8	1.5	Zircon U-Pb(SHRIMP)
374		Potassic alkali granite	103.237	22.7981	36.8	0.6	Zircon U-Pb(SHRIMP)	Lin Qingcha, Xia Bin, Zhang Yuquan, Wang Yanbin. 2005. Zircon SHRIMP dating of the Bayicun potassic alkali-granite, Jinping, Yunnan, in the southern segment of the Ailaoshan-Jinshajiang alkaline rock belt. Geological Bulletin of China, 24(5): 420-423 (in Chinese with English abstract).
375	YY1	Two-mica orthoclase granite	99.162	25.2081	36.27	0.48	Zircon U-Pb(SHRIMP)	Huang JingNing, Chen YongQing, Zhai XiaoMing, Lu YingXiang, Xie YongFu, Cheng ZhiZhong. 2011. Zircon SHRIM P U-Pb geochronology，geochemistry and petrogenesis of the upper Eocene Shuangmaidi peraluminous granite in Baoshan Block，Western Yunnan Terrain，southwestern China. Science China (Earth Sciences), 54(7): 982-997.
376	YY2	Two-mica orthoclase granite	99.1729	25.203	35.78	0.49	Zircon U-Pb(SHRIMP)
377	YS16-1	Granite porphyry	100.882	26.9468	35.8	1	Zircon U–Pb(LA-ICP-MS)	Zhou Ye, Xu Bo, Hou Zengqian, Wang Rui, Zheng Yuanchuan, He Wenyan. 2019. Petrogenesis of cenozoic high–sr/y shoshonites and associated mafic microgranular enclaves in an intracontinental setting: implications for porphyry cu-au mineralization in western yunnan, China. Lithos, 324–325: 39–54.
378	SG16-1	Granite porphyry	100.183	26.2812	37.2	1.1	Zircon U–Pb(LA-ICP-MS)
379	YS16-2	Mafic microgranular enclave	100.882	26.9468	35.09	0.35	Zircon U–Pb(LA-ICP-MS)
380	SJC16-2	Mafic microgranular enclave	99.9123	26.5894	34.48	0.89	Zircon U–Pb(LA-ICP-MS)
381	MCQ16-2	Mafic microgranular enclave	100.432	25.5222	35.76	0.44	Zircon U–Pb(LA-ICP-MS)
382	MCQ16-1	Monzogranite porphyry	100.432	25.5222	35.29	0.41	Zircon U–Pb(LA-ICP-MS)
383	ZH16-1	Quartz monzonite porphyry	100.913	27.0834	32.63	1.7	Zircon U–Pb(LA-ICP-MS)
384	SJC16-1	Quartz monzonite porphyry	99.9123	26.5894	34.52	0.83	Zircon U–Pb(LA-ICP-MS)
385	YZC16-1	Quartz monzonite porphyry	99.8068	26.9014	35.36	0.29	Zircon U–Pb(LA-ICP-MS)
386	MJ-14	Leucogranite	102.637	23.2608	27.4	0.2	Zircon U–Pb(LA-ICP-MS)	He Xiaohu, Tan Shucheng, Zhou Jiaxi, Liu Zheng, Caulfield John, Yang Siqi, Tian Huiquan. 2019. Petrogenesis and tectonic implications of late Oligocene highly fractionated leucogranites in the Ailao Shan-Red River shear zone, SW China. Journal of Asian Earth Sciences, 182: 103925.
387	GYS-07	Leucogranite	102.664	23.2036	27.7	0.2	Zircon U–Pb(LA-ICP-MS)
388	GYS-05	Leucogranite	102.639	23.2158	27.2	0.2	Zircon U–Pb(LA-ICP-MS)
389	LS-3	Syenogranite	104.002	20.2333	24	0.6	Zircon U–Pb(LA-ICP-MS)	Wang Xinyu, Yao Xin, Wang Shifeng, Zhu Xinyou, Wang Jingbin, Wang Chao. 2019. Intraplate extension of the indochina plate deduced from 26 to 24 ma a-type granites and tectonic implications. International Geology Review, 61(14): 1691-1705.
390	LS-4	Syenogranite	104.002	20.2331	26	0.7	Zircon U–Pb(LA-ICP-MS)
391	LS-5	Syenogranite	104.002	20.2328	26	0.3	Zircon U–Pb(LA-ICP-MS)
392	LS-6	Syenogranite	104.003	20.2322	26	0.4	Zircon U–Pb(LA-ICP-MS)
393	LS-8	Syenogranite	104.004	20.2322	26	0.3	Zircon U–Pb(LA-ICP-MS)
394	LS-9	Syenogranite	104	20.2344	26	0.4	Zircon U–Pb(LA-ICP-MS)
395	YA02	Auriferous ore	101.244	25.5202	30.2	3.8	Hematite U–Pb(LA-ICP-MS)	Zhou Haoyang, Sun Xiaoming, Wu Zhongwei, Liao Jianlin, Fu Yu, Li Dengfeng, Hollings Pete, Liu Ying, Lin Hai, Lin Zhiyong. 2017. Hematite U-Pb geochronometer: Insights from monazite and hematite integrated chronology of the yaoan gold deposit, Southwest China. Economic Geology, 112: 2023–2039.
396	YA01	Monazite-bearing auriferous	101.262	25.5171	31.7	0.7	Hematite U–Pb(LA-ICP-MS)
397	YA17	Syenite porphyry	101.244	25.5069	32.8	0.3	Zircon U–Pb(LA-ICP-MS)
398	VGS-32	Granite	105.167	19.4656	26	0.2	Zircon U–Pb(LA-ICP-MS)	Nagy, Elizabeth A., Scharer, Urs, Minh Nguyen Trung. 2000. Oligocene-Miocene granitic magmatism in central Vietnam and implications for continental deformation in Indochina. Terra Nova, 12(2): 67-76.
399	VGS-33	Granite	105.175	19.4703	23.7	+1.6/-1.7	Zircon U–Pb(LA-ICP-MS)
400	PTS-3	Granite porphyry	100.282	26.2487	36.5	0.6	Zircon U–Pb(ICP-MS)	Gao Xuequan, He Wenyan, Gao Xue, Bao Xinshang, Yang Zhen. 2017. Constraints of magmatic oxidation state on mineralization in the beiya alkali-rich porphyry gold deposit, western yunnan, China. Solid Earth Sciences, 2: 65-78.
401	WDS-4	Monzogranite porphyry	100.221	26.1745	36.2	0.6	Zircon U–Pb(ICP-MS)
402	HNT-1	Monzogranite porphyry	100.2	26.1425	36.6	1	Zircon U–Pb(ICP-MS)
403	MTW-1	Monzogranite porphyry	100.155	26.1385	36.4	0.6	Zircon U–Pb(ICP-MS)
404	NDP-1	Monzogranite porphyry	100.09	26.1477	35.5	0.8	Zircon U–Pb(ICP-MS)
405	BLC-3	Monzogranite porphyry	100.238	26.1406	36	0.4	Zircon U–Pb(ICP-MS)
406	YL-E22	Monzogranite porphyry	97.7208	31.3994	40.6	0.3	Zircon U–Pb(LA-ICP-MS)	Li Jinxiang, Qin Kezhang, Li Guangming, Cao Mingjian, Xiao Bo, Chen Lei, Zhao Junxing, Evans Noreen J., McInnes Brent I. A. 2012. Petrogenesis and thermal history of the Yulong porphyry copper deposit, Eastern Tibet: insights from U-Pb and U-Th/He dating, and zircon Hf isotope and trace element analysis. Mineralogy and Petrology, 105:201–221.
407	YL-E23	Monzogranite porphyry	97.7203	31.4003	41	0.4	Zircon U–Pb(LA-ICP-MS)
408	YL-SE7	Monzogranite porphyry	97.7219	31.4008	40.7	0.4	Zircon U–Pb(LA-ICP-MS)
409	YL-SE8	Monzogranite porphyry	97.7231	31.4017	41.2	0.3	Zircon U–Pb(LA-ICP-MS)
410	83-810	Barren porphyry	97.7795	31.3607	38.5	0.2	Zircon U–Pb(LA-ICP-MS)	Liang Huaying, Campbell Ian H., Allen Charlotte, Sun Weidong, Liu Congqiang, Yu Hengxiang, Xie Yingwen, Zhang Yuqiang. 2006. Zircon ce4+/ce3+ ratios and ages for yulong ore-bearing porphyries in eastern tibet. Miner Deposita, 41: 152–159.
411	81-862	Barren porphyry	97.7795	31.3621	34.3	0.4	Zircon U–Pb(LA-ICP-MS)
412	83-634	Barren porphyry	97.7807	31.3608	36	0.4	Zircon U–Pb(LA-ICP-MS)
413	Yulong	Ore-bearing porphyry	97.7211	31.3997	41.2	0.2	Zircon U–Pb(LA-ICP-MS)
414	Zhanaga	Ore-bearing porphyry	97.7947	31.23	38.5	0.2	Zircon U–Pb(LA-ICP-MS)
415	Mangzong	Ore-bearing porphyry	97.7854	31.169	37.6	0.2	Zircon U–Pb(LA-ICP-MS)
416	Duoxiasongduo	Ore-bearing porphyry	97.9056	31.0956	37.5	0.2	Zircon U–Pb(LA-ICP-MS)
417	Malasongduo	Ore-bearing porphyry	97.4133	31.0793	36.9	0.4	Zircon U–Pb(LA-ICP-MS)
418	BY	Mineralized skarn	100.198	26.1719	33.4	4.6	Allanite U–Pb(LA-ICP-MS)	Fu Yu, Sun Xiaoming, Li Dengfeng, Lin Hai, Lai Chunkit. 2017. LA-ICP-MS U-Th-Pb Dating and Trace Element Geochemistry of Allanite: Implications on the Different Skarn Metallogenesis between the Giant Beiya Au and Machangqing Cu-Mo-(Au) Deposits in Yunnan, SW China. Minerals, 7: 251.
419	MCQ	Mineralized skarn	100.423	25.5245	35.4	9.8	Allanite U–Pb(LA-ICP-MS)
420	WB1	Granitic leucosomes	97.3861	24.775	38.4	0.2	Zircon U-Pb(SIMS)	Liu Fulai, Wang Fang, Liu Pinghua, Yang Hong, Meng En. 2015. Multiple partial melting events in the ailao shan-red river and gaoligong shan complex belts, se tibetan plateau: zircon U-Pb dating of granitic leucosomes within migmatites. Journal of Asian Earth Sciences, 110: 151-169.
421	WB2	Granitic leucosomes	98.9994	24.8139	39.3	0.3	Zircon U-Pb(SIMS)
422	EB1	Granitic leucosomes	100.105	25.7386	33.6	0.2	Zircon U-Pb(SIMS)
423	EB2	Granitic leucosomes	102.766	23.1722	30.9	0.3	Zircon U-Pb(SIMS)
424	EB3	Granitic leucosomes	101.947	23.5722	27.8	0.2	Zircon U-Pb(SIMS)
425	WB3	Granitic leucosomes	97.4875	24.1008	26.3	0.3	Zircon U-Pb(SIMS)
426	ES1	Granitic leucosomes	101.966	23.5847	32.7	0.2	Zircon U-Pb(SIMS)
427	ES2	Granitic leucosomes	102.745	23.1392	33.2	0.2	Zircon U-Pb(SIMS)
428	ES3	Granitic leucosomes	103.751	22.7653	32	0.2	Zircon U-Pb(SIMS)
429	WS1	Granitic leucosomes	97.9861	25.2842	38.6	0.2	Zircon U-Pb(SIMS)
430	WS2	Granitic leucosomes	98.995	25.1083	27.4	0.2	Zircon U-Pb(SIMS)
431	ES4	Granitic leucosomes	100.149	25.5872	27.8	0.2	Zircon U-Pb(SIMS)
432	WH1	Granitic leucosomes	98.9842	24.7119	40.6	0.3	Zircon U-Pb(SIMS)
433	EH1	Granitic leucosomes	102.756	23.26	33.7	0.3	Zircon U-Pb(SIMS)
434	EH2	Granitic leucosomes	103.726	22.7878	27.1	0.3	Zircon U-Pb(SIMS)
435	WH2	Granitic leucosomes	97.5097	24.8181	27.4	0.3	Zircon U-Pb(SIMS)
436	ZK0812-389	Monzonitic granite porphyry	97.7322	31.4089	41.1	0.3	Zircon U-Pb(SIMS)	Huang Mingliang, Bi Xianwu, Richards Jeremy P., Hu Ruizhong, Xu Leiluo, Gao Jianfeng, Zhu Jingjing, Zhang Xingchun. 2019. High water contents of magmas and extensive fluid exsolution during the formation of the Yulong porphyry Cu-Mo deposit, eastern Tibet. Journal of Asian Earth Sciences, 176: 168–183.
437	ZK1007-607	Monzonitic granite porphyry	97.7358	31.4083	40.9	0.3	Zircon U-Pb(SIMS)
438	YL1636	Monzonitic granite porphyry	97.7422	31.3897	41.7	0.3	Zircon U-Pb(SIMS)
439	YL1643	Subeconomic intrusions	97.7344	31.4275	41.8	0.3	Zircon U–Pb(LA-ICP-MS)
440	YL1647	Subeconomic intrusions	97.7614	31.3583	41.8	0.2	Zircon U–Pb(LA-ICP-MS)
441	YL1648	Subeconomic intrusions	97.7356	31.3744	42.3	0.2	Zircon U–Pb(LA-ICP-MS)
442	ZK1205	Biotite monzogranite porphyry	97.72	31.4033	43.8	0.7	Zircon U-Pb(SHRIMP)	Wang ChengHui, Tang JuXing, Chen JianPing, Hao JinHua, Gao YiMing, Liu Yaowen, Fan Tao, Zhang Qizhi, Ying LiJuan, Chen Zhijiao. 2009. Chronological Research of Yulong Copper-Molybdenum Porphyry Deposit. Acta Geologica Sinica, 83(10): 83-93 (in Chinese with English abstract).
443	YLZK1007B45	Biotite monzogranite porphyry	97.7169	31.3981	43	0.5	Zircon U-Pb(SHRIMP)
444	NJZY31	Biotite quartz monzonite porphyry	97.7311	31.4294	41.4	0.6	Zircon U-Pb(SHRIMP)
445	GLLZK0150	Quartz monzogranite porphyry	97.7033	31.4036	43.9	0.6	Zircon U-Pb(SHRIMP)
446	ZK0607-585.8	biotite monzogranite porphyry	97.3005	31.8323	42.7	0.2	Zircon U–Pb(LA-ICP-MS)	Lin Bin, Wang Liqiang, Tang Juxing, Song Yang, Cao Huawen, Baker Michael J., Zhang Lejun, Zhou Xin. 2018. Geology, geochronology, geochemical characteristics and origin of baomai porphyry Cu (Mo) deposit, yulong belt, tibet. Ore Geology Reviews, 92: 186–204.
447	ZK0208-222.0	Diorite porphyry	97.3017	31.8326	37.8	0.2	Zircon U–Pb(LA-ICP-MS)
448	YL025	Biotite monzogranite porphyry	97.73	31.4028	41	1	Zircon U-Pb(SHRIMP)	Guo Liguo, Liu Yuping, Xu Wei, Zhang Xingchun, Qin Kezhang, Li Tiesheng, Shi Yuruo. 2006. Constraints to the mineralization age of the Yulong porphyry copper deposit from SHRIMP U–Pb zircon data in Tibet. Acta Petrologica Sinica, 21(4): 1009–1016 (in Chinese with English abstract).
449	YL051	Quartz monzonite porphyry	97.7328	31.4036	43.6	0.8	Zircon U-Pb(SHRIMP)
450	0908-308	K-feldspar granite porphyry	97.7306	31.4033	41.2	0.3	Zircon U–Pb(LA-ICP-MS)	Chang Jia, Li Jianwei, Selby David, Liu Jiacheng, Deng Xiaodong. 2017. Geological and Chronological Constraints on the Long-Lived Eocene Yulong Porphyry Cu-Mo Deposit, Eastern Tibet: Implications for the Lifespan of Giant Porphyry Cu Deposits. Economic Geology, 112: 1719–1746.
451	1007-988	Monzonitic granite porphyry	97.7314	31.4022	42	0.3	Zircon U–Pb(LA-ICP-MS)
452	1303-280	Quartz albite porphyry	97.7292	31.4042	40.2	0.3	Zircon U–Pb(LA-ICP-MS)
453	MJ-12	Garnet-bearing leucogranite	102.611	23.2531	27.8	0.4	Zircon U–Pb(LA-ICP-MS)	He Xiaohu, Tan Shucheng, Zhou Jiaxi, Liu Zheng, Zhao Zhifang, Yang Siqi, Zhang Yahui. 2020. Identifying the leucogranites in the Ailaoshan-Red River shear zone: Constraints on the timing of the southeastward expansion of the Tibetan Plateau. Geoscience Frontiers, 11: 765–781.
454	GYS-18	Two-mica leucogranite	102.637	23.2467	27.2	0.3	Zircon U–Pb(LA-ICP-MS)
455	MJ-24	Two-mica leucogranite	102.669	23.2664	27.4	0.2	Zircon U–Pb(LA-ICP-MS)
456	MJ-27	Two-mica leucogranite	102.669	23.2597	27.7	0.2	Zircon U–Pb(LA-ICP-MS)
457	TW-2	Granite porphyry	99.7392	22.7517	44.6	1.1	Zircon U-Pb(SHRIMP)	Li Feng, Chen Hui, Lu Wenju, Luo Siliang. 2010. Rock-forming Ages of the Laochang Granite-Porphyry, Lancang, Yunnan and Their Geological Significance. Geotectonica et Metallogenia. 34(1): 84-91 (in Chinese with English abstract).
458	JDS	Porphyritic biotite monzogranite	100.431	25.5379	37.93	0.82	Zircon U–Pb(LA-ICP-MS)	He Wenyan, Mo Xuanxue , Yu Xuehui, et al. 2011. Geochronological study of magmatic intrusions and mineralization of Machangqing porphyry Cu-Mo-Au deposit ,Western Yunnan Province .Earth Science Frontiers, 18(1): 207-215 (in Chinese with English abstract).
459	271	Quartz monzonite porphyry	97.7781	31.3558	41.3	0.3	Zircon U–Pb(LA-ICP-MS)	Liang Huaying, Mo Jihai, Sun Weidong, Yu Hengxiang, Zhang Yuquan, Charllote M.ALLEN. 2008. Study on the duration of the ore-forming system of the Yulong giant porphyry copper deposit in eastern Tibet, China. Acta Petrologica Sinica, 24(10): 2352-2358 (in Chinese with English abstract).
460	258	Syenite granite porphyry	97.7813	31.3542	41.2	0.3	Zircon U–Pb(LA-ICP-MS)
461	LLS3-1	Biotite granite	98.2786	24.9528	50.24	0.63	Zircon U-Pb(SIMS)	Wu Huaying, Deng Jun, Wang Qingfei, Zhang Lianchang, Cui Xiaolin, Shu Qihai, Zhang Qiwei, Zhou Shumin. 2019. SIMS U-Pb zircon geochronological and geochemical study of the Sn deposits in Tengchong, north of the Southeast Asian metallogenic belt: Implications for the timing of mineralization and ore genesis. Ore Geology Reviews, 111: 102954.
462	LLS28-1	Biotite granite	98.2764	24.9558	51.32	0.55	Zircon U-Pb(SIMS)
463	LXW15-80	Biotite granite	98.2611	24.9308	50.02	0.42	Zircon U-Pb(SIMS)
464	AI08176	Biotite granite	103.777	22.7847	31.44	0.53	Zircon U–Pb(LA-ICP-MS)	Chen Xiaoyu, Liu Junlai, Weng Shaoteng, Kong Yaliang, Wu Wenbin, Zhang Lisheng, Li Haiyan. 2016. Structural geometry and kinematics of the Ailao Shan shear zone: insights from integrated structural, microstructural, and fabric studies of the Yao Shan complex, Yunnan, Southwest China. Internation Geology Review, 58(7): 849–873.
465	YSXY1309	Two-mica granite	103.539	22.9186	30.65	0.41	Zircon U–Pb(LA-ICP-MS)
466	JDS038	Syenite porphyry	100.432	25.5376	34.6	0.7	Zircon U–Pb(LA-ICP-MS)	Dao Yan, Li Feng, Wang Rong, Wu Jing, Fan Zhuguo. 2015. GeochronologicaI Dating, Geochemical and Sr-Nd-Hf Isotopes of Cenozoic Syenite Porphyries in Jiudingshan, Yunnan: Constrains on its Petrogenesis. Geotectonica et Metallogenia, 39(3): 497-509 (in Chinese with English abstract).
467	404	Ore-bearing porphyry	97.7826	31.166	37.6	0.2	Zircon U–Pb(LA-ICP-MS)	Wu Jing, Liang Huaying, Mo Jihai, Zhang Yuquan, Hu Guangqian. 2011. Petrochemistry and Zircon LA-ICP-MS U-Pb Age of the Mangzong Porphyry Associated with Cu-Mo Mineralization in the Yulong Ore Belt. Geotectonica et Metallogenia, 35(2): 300-306 (in Chinese with English abstract).
468		Pyroxene Hornblende monzogranite porphyry	99.7982	26.7855	35.9	0.5	Zircon U–Pb(LA-ICP-MS)	Mao Xiaochang, Yin Fuguang, Lioa Shiyong. 2012. Zircon U-Pb Geochronology of the Taohuacun Porphyry, Middle part of the Jinshajiang-Ailaoshan Shear Zone, and its Geological Significance. Journal of Mineralogy and Petrology, 22(3):70-76 (in Chinese with English abstract).
469	JDS129	Granite porphyry	100.423	25.4992	34.9	2	Zircon U–Pb(LA-ICP-MS)	Dao Yan, Li Feng, Wang Rong, Wu Jing. 2015. Petrogenesis of the granite porphyry related to the Jiudingshan Cu-Mo deposit in western Yunnan：Constraints from LA-ICP-MS zircon U-Pb chronology, Sr-Nd-Hf isotopes and petrogeochemistry. Geology in China, 42(1): 134-148 (in Chinese with English abstract).
470	JDS025	Granite porphyry	100.43	25.5238	34.9	0.5	Zircon U–Pb(LA-ICP-MS)
471	JDS162	Granite porphyry	100.419	25.5192	34.6	0.7	Zircon U–Pb(LA-ICP-MS)
472	JDS164	Granite porphyry	100.419	25.5192	34.5	0.8	Zircon U–Pb(LA-ICP-MS)
473	11JDS037	Porphyritic granite	100.43	25.5238	34.7	0.6	Zircon U–Pb(LA-ICP-MS)	Dao Yan, Li Feng, Wang Rong, Wu Jing, Fan Zhuguo, Lu Shicai. 2014. Zircon U-Pb geochronology and geochemistry of porphyritic granite in the Jiudingshan area western Yunnan. Geology and Exploration, 50(3): 533-542 (in Chinese with English abstract).
474	10QTG-8	Granite	98.7795	24.8166	43	1	Zircon U–Pb(LA-ICP-MS)	Zhang Shiqi, Qi Xuexiang, Wei Cheng, Zhang Chao, Ji Fengbao. 2017. Eocene magmatism in the Gaoligong orogen, southwestern Yunnan, and its response to the collision of the India-Eurasia. Acta Petrologica Sinica, 33(12): 3842-3860 (in Chinese with English abstract).
475	10QTG-26	Granite	98.7587	24.8494	45	0.6	Zircon U–Pb(LA-ICP-MS)
476	10QTG-28	Granite	98.7379	24.8541	46	0.8	Zircon U–Pb(LA-ICP-MS)
477	10QTG-62	Granite	98.7463	24.9467	47	0.5	Zircon U–Pb(LA-ICP-MS)
478	11QDC-34	Granite	100.103	25.6822	27.9	0.7	Zircon U–Pb(LA-ICP-MS)	Qi Xuexiang, Zhao Yuhao, Zhu Luhua, Hu Zhaochu, Zhang Chao, Ji Fengbao. 2014. Cenozoic magmatism in Diancanshan Range, southwestern Yunnan, China, and its tectonic implications. Acta Petrologica Sinica,30(8): 2217-2228 (in Chinese with English abstract)
479	12QDC-5	Granite	100.103	25.6792	28.5	0.5	Zircon U–Pb(LA-ICP-MS)
480	12QDC-11	Granite	100.094	25.6744	34.8	0.4	Zircon U–Pb(LA-ICP-MS)
481	08QL-2	Granite porphyry	103.035	22.8119	37.1	0.47	Zircon U–Pb(LA-ICP-MS)	Zhang Chao, Qi Xuexiang, Tang Guanzong, Zhao Yuhao, Ji Fengbao. 2014. Geochemistry and zircon U-Pb dating for the alkaline porphyries and its constraint on the mineralization in Chang’an Cu-Mo-Au ore concentration region, Ailaoshan orogenic belt, western Yunnan. Acta Petrologica Sinica,30(8): 2204-2216 (in Chinese with English abstract).
482	08QC-15	Syenite porphyry	103.034	22.8125	35.8	0.28	Zircon U–Pb(LA-ICP-MS)
483	12QCAC-3-1	Syenite porphyry	103.033	22.8139	21.7	0.31	Zircon U–Pb(LA-ICP-MS)
484	CA005	Syenite	103.031	22.8133	32.5	0.1	Zircon U–Pb(LA-ICP-MS)	Tian Guang, Zhang Changqing, Peng Huijuan, Zhou Yunman, LI Jianrong, Zhang Xingpei, Hu Mingyue. 2014. Petrogenesis and geodynamic setting of the Chang’an gold deposit in southern Ailaoshan metallogenic belt. Acta Petrologica Sinica, 30(1): 125-138 (in Chinese with English abstract).
485	zk805	Syenite porphyry	103.035	22.8156	33	0.1	Zircon U–Pb(LA-ICP-MS)
486	HTL1141	Granite	98.7681	24.505	59.9	3.6	Zircon U–Pb(LA-ICP-MS)	Dong MeiLing, Dong GuoChen, Mo XuanXue, ZHu DiCheng, Nie Fei, Yu JunChuan, Wang Peng, Luo Wei. 2013. The Mesozoic-Cenozoic magmatism in Baoshan Block, western Yunnan and its tectonic significance. Acta Petrologica Sinica, 29(11): 3901-3913 (in Chinese with English abstract).
487	DP1145	Granite	98.7694	24.4897	66.1	1.8	Zircon U–Pb(LA-ICP-MS)
488	10HH-121	Granitic mylonite	101.919	23.5553	22.9	1.1	Zircon U–Pb(LA-ICP-MS)	Guo, Xiaofei, Wang, Yuejun, Liu, Huichuan, Zi, Jianwei. 2016. Zircon U-Pb geochronology of the cenozoic granitic mylonite along the ailaoshan-red river shear zone: new constraints on the timing of the sinistral shearing. Journal of Earth Science, 27(3): 435-443.
489	10HH-103	Granitic mylonite	102.432	23.2865	28.9	0.5	Zircon U–Pb(LA-ICP-MS)
490	10HH-66	Granitic mylonite	102.765	23.0554	37.6	1.6	Zircon U–Pb(LA-ICP-MS)
491	10HH-105B	Leucosome	102.416	23.3096	26.8	0.5	Zircon U–Pb(LA-ICP-MS)
492	10HH-26B	Leucosome	103.329	22.996	25.8	0.4	Zircon U–Pb(LA-ICP-MS)
493	BJS	quartz-monzonite-porphyry	100.436	25.5869	35.6	0.2	Zircon U–Pb(LA-ICP-MS)	Zhou Jie,, Li Sanzhong, Wang Genhou, Santosh M., Zhang Li, Yu Shengyao, Liu Yiming, Li Xiyao. 2018. Petrogenesis of eocene mineralized porphyry in bijiashan, eastern margin of tibet plateau: constraints from geochronology, geochemistry and hf isotopes. Lithos, 316–317: 1–18.
494		Quartz syenite porphyry	100.19	26.2099	36.2	0.4	Zircon U–Pb(LA-ICP-MS)	Zhou Jiaxi, Dou Song, Huang Zhilong, Cui Yinliang, Ye Lin, Li Bo, Gan Ting, Sun Hairui. 2016. Origin of the Luping Pb deposit in the Beiya area, Yunnan Province, SW China: Constraints from geology, isotope geochemistry and geochronology. Ore Geology Reviews, 72: 179–190.
495	DZP-0	Biotite monzogranite	98.1097	25.2617	65.4	0.3	Zircon U–Pb(LA-ICP-MS)	Cao Huawen, Zhang Yunhui, Santosh M., Zhang Shouting, Tang Li, Pei Qiuming. 2018. Mineralogy, zircon U-Pb-Hf isotopes, and whole-rock geochemistry of Late Cretaceous-Eocene granites from the Tengchong terrane, western Yunnan, China: Record of the closure of the Neo-Tethyan Ocean. Geological Journal, 53: 1423–1441.
496	LLS-0	Biotite monzogranite	98.2656	24.9369	49.6	0.8	Zircon U–Pb(LA-ICP-MS)
497	SD018	Trachyte	98.6457	24.7201	2.87	0.34	Zircon U-Pb(SHRIMP)	Shi Yuruo,Wu Zhonghai,Fan Taoyuan,Tong Yabo,Yang Zhenyu. 2012. SHRIMP zircon U-Pb dating and geochemical analysis of the Pliocene volcanic rocks from Longchuanjiang valley, Tengchong area, western Yunnan Province. Geological Bulletin of China, 31(2): 241-249 (in Chinese with English abstract).
498	SD024-2	Trachyte andesite	98.6428	24.7184	2.8	0.11	Zircon U-Pb(SHRIMP)
499	10GLG35-1	Granite	98.8347	27.4544	61.7	3.6	Zircon U–Pb(LA-ICP-MS)	Liu, Zheng, Liao Shiyong, Tan Shucheng, He Xiaohu, Wang Guochang, Wang Dongbing, Zhou Qing. 2019. Paleocene Neo‑tethyan slab rollback constrained by A1‑type granitic intrusion in the gaoligong-tengliang-yingjiang belt of the eastern himalayan syntaxis, SE Tibet. International Journal of Earth ences, 108(6): 2113-2128.
500	18-CA-N1	Lamprophyre	103.032	22.8142	35.3	0.4	Zircon U–Pb(LA-ICP-MS)	Xin Wei, Sun Fengyue, Xu Zhihe, Lu Yinhua, Zhang Yajing, Deng Jiafang, Li Jinyu, Zhang Yuting, Gao Hongchang. 2020. Potassic/ultrapotassic intrusions at the southwestern margin of the Yangtze Craton, southwestern China: Petrogenesis and implications for the metal and fluid source of non-arc porphyry Cu–(Mo–Au) deposits. Lithos, 352–353: 105294.
501	18-CA-N6	Ore-barren granite porphyry	103.023	22.8147	35.4	0.3	Zircon U–Pb(LA-ICP-MS)
502	18-CA-N3	Ore-barren granite porphyry	103.033	22.8158	33.8	0.3	Zircon U–Pb(LA-ICP-MS)
503	18-CAC-N8	Quartz monzonite	102.961	22.825	34.5	0.3	Zircon U–Pb(LA-ICP-MS)
504	18-CAC-N1-1	Quartz monzonite porphyry	102.961	22.8258	33.6	0.3	Zircon U–Pb(LA-ICP-MS)
505	18-CA-N7	Quartz monzonite porphyry	103.066	22.7964	34.6	0.3	Zircon U–Pb(LA-ICP-MS)
506	LL96	Biotite granite	97.8427	24.3395	50.6	0.6	Zircon U–Pb(LA-ICP-MS)	Zhao Shaowei, Lai Shaocong, Qin Jiangfeng, Zhu RenZhi. 2016. Petrogenesis of Eocene granitoids and microgranular enclaves in the western Tengchong Block: Constraints on eastward subduction of the Neo-Tethys. Lithos, 264: 96–107.
507	LC2-17	Biotite granite	97.84	24.3401	48.9	0.5	Zircon U–Pb(LA-ICP-MS)
508	LC2-09	Granodiorite	97.8429	24.3404	50	0.4	Zircon U–Pb(LA-ICP-MS)
509	LC2-30	Mafic enclave	97.8399	24.3502	49.8	0.2	Zircon U–Pb(LA-ICP-MS)
510		Porphyritic granite	100.428	25.5207	36.17	0.36	Zircon U–Pb(LA-ICP-MS)	Chu Yating, Liu Xianfan, Zhao Fufeng, Lu Qiuxia, Li Chunhui. 2013. Dating of Ore-Bearing Porphyritic Granite from the Machangqing Mo-Cu-Au Deposit in Western Yunnan Province and Its Geologic Significance. Journal of Jilin University(Earth Science Edition), 43(5): 71-86 (in Chinese with English abstract).
511	FL17-2	Pseudoleucite porphyry	101.295	25.3985	34.15	0.59	Zircon U–Pb(LA-ICP-MS)	Luo Chenhao. 2018. The Geochronology, Geochemistry characteristics and Petrogenesis of the Alkali-rich porphyry in Yao'an, west Yunnan province (Master dissertation). China University of Geosciences, Beijing (in Chinese with English abstract).
512	YA16-1-12	Pseudoleucite porphyry	101.298	25.3979	32.47	0.39	Zircon U–Pb(LA-ICP-MS)
513	YA16-5	Syenite porphyry	101.273	25.3857	33.52	0.32	Zircon U–Pb(LA-ICP-MS)
514	YA16-6	Syenite porphyry	101.272	25.3892	33.6	0.27	Zircon U–Pb(LA-ICP-MS)
515	YA16-3	Syenite porphyry	101.274	25.3898	33.24	0.31	Zircon U–Pb(LA-ICP-MS)
516	YA15-1-12	Syenite porphyry	101.275	25.3918	33.82	0.42	Zircon U-Pb(SHRIMP)
517	FL17-3	Trachyte	101.279	25.3902	33.97	0.56	Zircon U–Pb(LA-ICP-MS)
518	YA16-1-10	Trachyte	101.283	25.3944	32.01	0.51	Zircon U–Pb(LA-ICP-MS)
519	YA1401	Monzonite porphyry	101.255	25.383	33.53	0.35	Zircon U–Pb(LA-ICP-MS)	Zhao Yanggang. 2016. Geochemistry and Petrogenesis of the Cenozoic alkali-rich porphyry in Yaoan aera, Yunnan province (Master dissertation). China University of Geosciences, Beijing (in Chinese with English abstract).
520	YA1403	Monzonite porphyry	101.256	25.3832	33.03	0.33	Zircon U–Pb(LA-ICP-MS)
521	YA1405	Monzonite porphyry	101.255	25.3833	32.85	0.48	Zircon U–Pb(LA-ICP-MS)
522	SLC11–2	Granite	103.274	23.1672	35.2	0.4	Zircon U–Pb(LA-ICP-MS)	Xu Leiluo, Bi Xianwu, Hu Ruizhong, Tang Yongyong, Wang Xinsong, Huang, Mingliang, Wang Yingjing, Ma Rui, Liu Gong. 2019. Contrasting whole-rock and mineral compositions of ore-bearing (tongchang) and ore-barren (shilicun) granitic plutons in SW china: implications for petrogenesis and ore genesis. Lithos, 336–337: 54–66.
523	TC917	Quartz syenite porphyry	103.052	22.7914	36.3	0.2	Zircon U–Pb(LA-ICP-MS)
524	GY06	Biotite granite	98.2042	25.3783	64	1	Zircon U–Pb(LA-ICP-MS)	Zhao Shaowei, Lai Shaocong, Qin Jiangfeng, Zhu RenZhi, Wang Jiangbo. 2017. Geochemical and geochronological characteristics of Late Cretaceous to Early Paleocene granitoids in the Tengchong Block, Southwestern China: Implications for crustal anatexis and thickness variations along the eastern Neo-Tethys subduction zone. Tectonophysics, 694: 87-100.
525	GY17	Granite	98.2275	25.3579	65	1	Zircon U–Pb(LA-ICP-MS)
526	GY46	Granite	98.264	25.3453	64	1	Zircon U–Pb(LA-ICP-MS)
527	LC28	Granodiorite	97.7507	24.4642	64	1	Zircon U–Pb(LA-ICP-MS)
528	RL0	Quartz monzonite porphyry	100.026	27.446	35.6	1.4	Zircon U-Pb(SHRIMP)	Xue Chuandong, Luo Shaoyong, Song Yucai, Yang Zhiming, Han Yanwei, Huang Qinhui, Li Jing, Wei Aiying. 2010. Zircon SHRIMP U-Pb dating and its geological significance of Lujiacun quartz-momnzonite porphyry in Shangri-la Country, northwestern Yunnan Province, China. Acta Petrologica Sinica, 26(06): 215-225 (in Chinese with English abstract).
529	RL708	Quartz monzonite porphyry	100.026	27.4444	36.7	0.8	Zircon U-Pb(SHRIMP)
530		Syenite	103.065	22.7979	36	0.2	Zircon U–Pb(ELA-ICP-MS)	Liang Huaying, Campbell Ian H., Xie Yingwen, Zhang Yuquan. 2002. Zircon Age Dated by ELA-ICP-MS for Ore-Bearing Porphyry in Jinping Tongchang. Mineral Deposits, 21(S1):421-422 (in Chinese with English abstract).
531	CA32	Biotite granite	103.033	22.8128	34.49	0.24	Zircon U–Pb(LA-ICP-MS)	Zhang Jing, Wang Huan, Li Shihui, Li Tengjian. 2017. Paleogene magmatism and gold metallogeny of the jinping terrane in the ailaoshan ore belt, sanjiang tethyan orogen (SW china): geology, deposit type and tectonic setting. Ore Geology Reviews, 91: 620–637.
532	CA115	Biotite granite	103.032	22.8147	34.47	0.07	Zircon U–Pb(LA-ICP-MS)
533	YCP03	Syenite	102.99	22.7939	34.12	0.06	Zircon U–Pb(LA-ICP-MS)
534	YCP04	Syenite	102.992	22.7953	34.19	0.15	Zircon U–Pb(LA-ICP-MS)
535	CAC07	Syenite porphyry	102.963	22.8267	33.66	0.06	Zircon U–Pb(LA-ICP-MS)
536	CAC09	Syenite porphyry	102.964	22.8278	34.3	0.05	Zircon U–Pb(LA-ICP-MS)
537	BB163	Mafic enclave in granite	100.435	25.5258	35.13	0.23	Zircon U–Pb(LA-ICP-MS)	Guo Xiaodong, Ge Liangsheng, Wang Liang, Wang Zhihua, Shi Xiaocui. 2012. Characteristics of deep-derived enclave and its zircon LA-ICP-MS U-Pb age of Machangqing complex, Yunnan Province. Acta Petrologica Sinica, 28(5): 1413-1424(in Chinese with English abstract).
538	WDS-1	Quartz syenite porphyry	100.197	26.1766	34.92	0.66	Zircon U–Pb(LA-ICP-MS)	He Wenyan, Yu Xuehui, Mo Xuanxue, He Zhonghua, Li Yong, Huang Xingkai, Su Gangsheng. 2012. Genetic types and the relationship between alkali-rich intrusion and mineralization of Beiya gold-polymetallic ore field, western Yunnan Province, China. Acta Petrologica Sinica, 28(5): 1401-1412 (in Chinese with English abstract).
539	HNT-1	Quartz syenite porphyry	100.198	26.1434	36.24	0.63	Zircon U–Pb(LA-ICP-MS)
540	Z-106	Monzogranite porphyry	97.7918	31.2294	38.5	0.2	Zircon U–Pb(LA-ICP-MS)	He Guochao, Wang Guangqiang, Huang Wenting, Zou Yinqiao, Wu Jing, Liang Huaying, Zhang Yuquan, Charllote M ALLEN. 2014. Zircon LA-ICP-MS U-Pb age of the Zalaga porphyry associated with Cu-Mo mineralization in the Yulong ore belt and its geological implication. Geochimica, 43(4): 399–407 (in Chinese with English abstract).
541	Z-141	Syenite granite porphyry	97.795	31.2316	38.5	0.2	Zircon U–Pb(LA-ICP-MS)
542	83-931	Monzogranite porphyry	98.6393	30.1148	39.4	0.2	Zircon U–Pb(LA-ICP-MS)	Chen Xilian, Huang Wenting, Zou Yinqiao, Liang Hhuaying, Zhang Jian, Zhang Yuquan .2016. Zircon U-Pb geochronology and geochemistry of ore-bearing porphyries in the southern Yulong porphyry copper belt, and factors resulting in the differences in scale of mineralization between the southern and northern Yulong porphyry copper belt. Acta Petrologica Sinica, 32(8): 2522-2534 (in Chinese with Englis…
543	83-85	Quartz monzonite porphyry	98.5432	29.9152	39.4	0.2	Zircon U–Pb(LA-ICP-MS)
544	83-110	Syenite porphyry	98.6344	29.9392	38.5	0.3	Zircon U–Pb(LA-ICP-MS)
545	ZK0208-266.0m	Biotite granite	97.4269	31.7583	41.3	0.2	Zircon U–Pb(LA-ICP-MS)	Lin Bin, Wang Liqiang, Tang Juxing, Song Yang, Zhou Xin, Liu Zhibo, Gao Yiming, Tang Xiaoqian, Xu Ruige, Chen Zaojun. 2017. Zircon U-Pb Geochronology of Ore-Bearing Porphyries in Baomai Deposit, Yulong Copper Belt, Tibet. Earth Science, 42(9): 17-34 (in Chinese with English abstract).
546	ZK0507-789.2m	Biotite monzogranite	97.4311	31.7536	40.8	0.2	Zircon U–Pb(LA-ICP-MS)
547	N008	Granodiorite porphyry	94.7875	33.5328	41.44	0.23	Zircon U–Pb(LA-ICP-MS)	Song Zhongbao, Jia Qunzi, Chen Xiangyang, Chen Bo, Zhang Yulian, Zhang Xiaofei, Quan Shoucun, Li Yazhi. 2011. The Petrogenic age of Narigongma Granitic Diorite-porphyry in the Northern Part of the Sanjiang Region and Its Geological Implications. Acta Geoscientica Sinica, 32(2): 154-162 (in Chinese with English abstract).
548	MCQMO-7	Granite porphyry	100.442	25.5278	36.17	0.36	Zircon U–Pb(LA-ICP-MS)	Wu Ran, Liu Xianfan, Xiao Jixiong, Fan Peng. 2010. Geochronology of Rock Ore in Machangqing deposit. Mineral Deposits, 29(s): 521-522 (in Chinese).
549	BB108	Porphyritic‐like granite	100.435	25.5264	33.78	0.21	Zircon U–Pb(LA-ICP-MS)	Guo Xiaodong, Wang Zhihua, Wang Liang, Yang Yuxia, Chen Xiaowu. 2011. LA-ICP-MS zircons U-Pb ages of porphyritic granite in Machangqing complex of Yunnan Province and their geological significance. Geology in China, 38(3): 610-622 (in Chinese with English abstract).
550	LHS-11	Quartz monzonite porphyry	100.311	25.1962	34.11	0.36	Zircon U–Pb(LA-ICP-MS)	Xiao Changhao. 2013. The Study on Minerogenic Series of Epithermal Deposits in Mid-southern Segment of the Sanjiang Orogenic Belt, Southwest China (Doctor dissertation). China University of Geosciences, Beijing (in Chinese with English abstract).
551	D4310	Biotite monzonite granite	98.4558	24.5656	58.3	0.5	Zircon U–Pb(LA-ICP-MS)	Cong Feng, Lin Shiliang, Xie Tao, Li Zaihui, Zou Guangfu, Liang Ting. 2010. Rare Earth Element Geochemistry and U-Pb Age of Zircons from Granites in Tengchong-Lianghe Area , Western Yunnan. Journal of Jilin University(Earth Science Edition), 40(3): 108-115 (in Chinese with English abstract).
552	MA02	Trachyandesitic rock	98.4342	25.0207	0.091	0.006	Zircon U–Pb(CAMECA)	Zou Haibo, Fan Qicheng, Schmitt Axel K., Sui Jianli. 2010. U–Th dating of zircons from Holocene potassic andesites (Maanshan volcano, Tengchong, SE Tibetan Plateau) by depth profiling: Time scales and nature of magma storage. Lithos, 118(1-2): 202-210.
553	MA02	Trachyandesitic rock	98.4338	25.0211	0.055	0.007	Zircon U–Pb(CAMECA)
554	ET207A	Granite	97.0865	28.5639	56.5	0.4	Zircon U–Pb(LA-ICP-MS)	Chiu Han Yi, Chung Sun Lin, Wu Fu Yuan, Liu Dunyi, Liang Yu Hsuan, Lin I Jhen, Iizuka Yoshiyuki, Xie Lie Wen, Wang Yanbin, Chu Mei Fei. 2009. Zircon U–Pb and Hf isotopic constraints from eastern Transhimalayan batholiths on the precollisional magmatic and tectonic evolution in southern Tibet. Tectonophysics, 477(1-2): 3-19.
555	ET014C	Granite	94.07	30.11	58.7	3.1	Zircon U–Pb(SHRIMP)	Liang, Y. H., Chung, S. L., Liu, D., Xu, Y., Wu, F. Y., Yang, J. H., Wang, Y., Lo, C. H.. 2008. Detrital zircon evidence from Burma for reorganization of the eastern Himalayan river system. American Journal of Science, 308(4): 618-638.
556	ET113B	Granite	97.0853	28.5675	59.1	3.2	Zircon U–Pb(SHRIMP)
557	MS 99-4-18-(1)	Trachydacite	96.5321	32.2448	36	3	Zircon U–Pb(CAMECA)	Spurlin, Matthew S., Yin An, Horton Brian K., Zhou Jiangyu, Wang Jianghai. 2005. Structural evolution of the Yushu-Nangqian region and its relationship to syncollisional igneous activity, east-central Tibet. Geological Society of America Bulletin, 117(9-10): 1293-1317.
558	QGS 35	Monzonitic granite	96.3115	32.9718	48.5	1	Zircon U–Pb	Roger Francoise, Tapponnier Paul, Arnaud Nicolas, Schrer Urs, Brunel Maurice, Xu Zhiqin, Yang Jingsui. 2000. An Eocene magmatic belt across Central Tibet: Mantle subduction triggered by the Indian collision? Terra Nova, 12(3): 102-108.
559	BL-13	Granite	99.0364	26.02	54.8	1.6	Zircon U–Pb(SHRIMP)	Zhang Bo, Zhang Jinjiang, Zhong Dalai. 2010. Structure, kinematics and ages of transpression during strain-partitioning in the Chongshan shear zone, western Yunnan, China. Journal of structural geology, 32(4): 445-463.
560	BL-13	Granite	99.0364	26.02	38.7	1.2	Zircon U–Pb(SHRIMP)
561	BL-3	Granite pegmatite vein	98.9083	27.0989	45.4	0.53	Zircon U–Pb(LA-ICP-MS)
562	BL-3	Granite pegmatite vein	98.9083	27.0989	49.55	0.61	Zircon U–Pb(LA-ICP-MS)
563	Y05-30	Granitic pegmatite vein	99.2981	25.4153	50.1	1.3	Zircon U–Pb(SHRIMP)
564	BL-8	Granitic vein	99.0181	26.0933	32.6	1.5	Zircon U–Pb(SHRIMP)
565	Y05-35	Leucogranite vein	99.3328	25.3681	31.5	0.24	Zircon U–Pb(LA-ICP-MS)
566	BL-12	Leucogranite vein	99.0578	26.0128	42.63	0.39	Zircon U–Pb(LA-ICP-MS)
567	BL-5	Leucosome	98.9453	27.1478	40.13	0.15	Zircon U–Pb(LA-ICP-MS)
568	YY15+YY16	Leucocratic dike	101.849	23.7405	22.55	0.25	Monazite Th-Pb(SHRIMP)	Sassier C., Leloup P. H., Rubatto D., Galland O., Yue Y., Ding Lin. 2009. Direct measurement of strain rates in ductile shear zones: A new method based on syntectonic dikes. Journal of Geophysical Research Solid Earth, 114: B01406.
569	YY29	Leucocratic dike	101.849	23.7413	26.25	0.49	Monazite Th-Pb(SHRIMP)
570	YY22	Leucocratic dike	101.849	23.7418	29.89	0.46	Monazite Th-Pb(SHRIMP)
571	YY23+YY24	Leucocratic dike	101.85	23.7409	29.93	0.38	Monazite Th-Pb(SHRIMP)
572	160324-11	Fraidronite	99.868	26.448	34.85	0.08	Zircon U–Pb(LA-ICP-MS)	Li Wenchang, Jiang Xiaojun. 2020. The Cenozoic tectono-magmatism-mineralization effect of the intracontinental tectonic transformation system in the western margin of Yangtze Block. Earth Science Frontiers, 27(2): 151-164 (in Chinese with English abstract).
573	160116-5	Hornblende monzonite granite	101.056	26.0562	29.31	0.34	Zircon U–Pb(LA-ICP-MS)
574	160112-11	Quartz monzonite granite	101.292	25.3852	32.37	0.12	Zircon U–Pb(LA-ICP-MS)
575	160112-14	Quartz monzonite granite	101.294	25.3835	32.6	0.09	Zircon U–Pb(LA-ICP-MS)
576	160323-1	Syenite porphyry	99.8154	26.6525	36.38	0.35	Zircon U–Pb(LA-ICP-MS)
577	160116-6	Syenite porphyry	101.385	26.0685	30.34	0.14	Zircon U–Pb(LA-ICP-MS)
578	160117-1	Syenite porphyry	101.069	25.1789	31.57	0.09	Zircon U–Pb(LA-ICP-MS)
579	160117 5	Syenite porphyry	101.065	25.1741	32.61	0.07	Zircon U–Pb(LA-ICP-MS)
580	160117-9	Syenite porphyry	101.054	26.2674	34.1	0.14	Zircon U–Pb(LA-ICP-MS)
581	160112-12	Syenite porphyry dyke	101.258	25.3402	30.75	0.06	Zircon U–Pb(LA-ICP-MS)
582	DY	Lamprophyre	101.361	25.9089	32.59	0.27	Zircon U–Pb(SHRIMP)	Wu Peng, Tan Mao, Han Runsheng, Jiang Xiaojun, Wang Die, Yang Hang. 2020. Geochemistry, chronology and geological significance of lamprophyres from the Liuju sandstone copper deposit in the Chuxiong basin, central Yunnan. Acta Petrologica Sinica, 36(5): 1409-1425 (in Chinese with English abstract).
583	B	Granitic xenolith	100.307	26.4453	36.21	0.36	Zircon U–Pb(LA-ICP-MS)	Duan Wenjing, Zhao Fufeng, Ren Kefa, Liu Xianfan, Deng Jianghong, Yang Mimi, Chu Yating. 2020. Zircon U-Pb dating and trace element geochemistry in syenite porphyry and granite xenoliths from Liuhe, western Yunnan, China. Earth Science Frontiers, 27(3): 154-167 (in Chinese with English abstract).
584	B	Granitic xenolith	100.337	26.4323	38.21	0.44	Zircon U–Pb(LA-ICP-MS)
585	Z	Syenite porphyry	100.307	26.4453	35.87	0.58	Zircon U–Pb(LA-ICP-MS)
586	Z	Syenite porphyry	100.337	26.4323	37.89	0.96	Zircon U–Pb(LA-ICP-MS)
587	D1072-5	Andesite	99.6371	26.4562	33.1	1.2	Zircon U–Pb(LA-ICP-MS)	Liao Cheng, Yang Tiannan, Xue Chuandong, Liang Mingjuan, Xin Di, Xiang Kun, Jiang Lili, Shi Pengliang, Zhu Wenbin, Wan Liangchun, Tang Jing, Yu Jing, Wu Pinglei. 2020. Eocene Basins on the SE Tibetan Plateau: Markers of Minor Offset along the Xuelongshan–Diancangshan–Ailaoshan Structural System. Acta Geologica Sinica (English Edition), 94(4):1020-1041.
588	D2123-1	Andesite	99.7218	26.4996	36.9	2.4	Zircon U–Pb(LA-ICP-MS)
589	D4101-7	Leucocratic dike	99.7125	26.4928	35.6	0.66	Zircon U–Pb(LA-ICP-MS)
590	D1094-1	Syenite porphyry	99.7134	26.4908	34.7	2.3	Zircon U–Pb(LA-ICP-MS)
591	D2025-7	Volcanic breccia	99.6318	26.4347	35.04	0.74	Zircon U–Pb(LA-ICP-MS)
592	D2025-6	Volcanic breccia	99.6469	26.4365	35.7	1.9	Zircon U–Pb(LA-ICP-MS)
593	D1098-2	Volcanic breccia	99.7218	26.4905	35.7	2.4	Zircon U–Pb(LA-ICP-MS)
594	D4044-1B	Volcanic tuff	99.6272	26.4711	35.46	0.72	Zircon U–Pb(LA-ICP-MS)
595	D4046-1	Volcanic tuff	99.6207	26.4817	35.2	1.2	Zircon U–Pb(LA-ICP-MS)
596	D2051-1	Volcanic tuff	99.6209	26.4817	34.04	0.68	Zircon U–Pb(LA-ICP-MS)
597		Granitic xenolith	100.341	26.4194	38.63	0.52	Zircon U–Pb(LA-ICP-MS)	Chu Yating, Liu Xianfan, Zhao Fufeng, Yang Yufan, Zheng Jie, Li Na. 2016. Geological significance for age and REE characteristic of zircons in the Cenozoic ore-bearing porphyry and granitic xenoliths in western Yunnan, China. Journal of Chengdu University of Technology (Science & Technology Edition), 43(5): 539-554 (in Chinese with English abstract).
598		Porphyritic granite	100.432	25.5001	35.8	0.2	Zircon U–Pb(LA-ICP-MS)
599	TC10017	Volcanic rock	98.45	24.85	0.89	0.02	Zircon U–Pb(SIMS)	Cheng Zhihui, Guo Zhengfu, Dingwell Donald B., Li Xiaohui, Zhang Maoliang, Liu Jiaqi, Zhao Wenbin, Lei Ming. 2020. Geochemistry and petrogenesis of the post-collisional high-K calc-alkaline magmatic rocks in Tengchong, SE Tibet. Journal of Asian Earth Sciences, 193: 104309
600	TC10018	Volcanic rock	98.46	24.84	0.9	0.07	Zircon U–Pb(SIMS)
601	TC09045	Volcanic rock	98.43	24.97	0.7	0.04	Zircon U–Pb(SIMS)
602	N006	Biotite granite porphyry	94.7832	33.5227	41.53	0.24	Zircon U–Pb(LA-ICP-MS)	Song Zhongbao, Jia Qunzi, Zhang Yulian, Chen Bo, Chen Xiangyang，Wang Fuchun, Tian Yongge, Li Yazhi, Zhang Xiaofei, Quan Shoucun．2012. LA-ICP-MS zircon U-Pb dating of Narigongma biotite granite porphyry in northern Sanjiang region and its geological significance. Geological Bulletin of China, 31(2/3)：439-447 (in Chinese with English abstract).
603	N002	Plagiogranite Porphyry	94.7811	33.5306	41	0.18	Zircon U–Pb(LA-ICP-MS)	Chen Xiangyang, Li Yazhi, Zhang Yulian, Song Zhongbao, Jia Qunzi. 2013. Chronological and Geological Significance of Narigongm a Plagiogranite Porphyry in the North Part of the Sanjiang Region. Northwestern Geology, 46(4): 49-56 (in Chinese with English abstract).
604	NQ4-6	Monzonite porphyry	96.5044	32.0831	35	1.1	Zircon U–Pb(LA-ICP-MS)	Yuan Yajuan, Xia Bin, Zhang Yuquan, Xia Lianze, Li He. 2013. Geochemistry and Zircon U-Pb ages of the Potassic Alkalic Rocks at Nangqian County, Qinghai Province. Geological Journal of China Universitie, 19(4): 611-619 (in Chinese with English abstract).
605	NQ7-1	Syenite porphyry	96.5189	32.0569	35.3	0.5	Zircon U–Pb(LA-ICP-MS)
606	NQ3	Trachy-basalt	96.5128	32.0939	34.9	1.2	Zircon U–Pb(LA-ICP-MS)
607	LW01-1	Trachy-andesite	98.3856	29.685	35.53	0.28	Zircon U–Pb(SIMS)	Xu Yue, Xu Leiluo, Bi Xianwu, Hu Ruizhong, Li Juan. 2019. Petrogenesis and metallogenic implications of volcanic rocks from the Lawu basin, eastern Tibet: Insights into the intracontinental Eocene-Oligocene porphyry copper systems. Ore Geology Reviews, 111: 103001.
608	LW04-2	Trachy-andesite	98.3453	29.7564	35.37	0.25	Zircon U–Pb(SIMS)
609	LW05-1	Trachyte	98.6417	29.9411	36.1	0.28	Zircon U–Pb(SIMS)
610	SL-2	Biotite monzonite granite porphyry	98.6393	30.1148	39.3	0.4	Zircon U–Pb(LA-ICP-MS)	Hu Zhiyu, Wang Luchao. 2018. Geochemical Characteristics and Genesis of the Seli Intrusive Body in Eastern Tibet. Bulletin of Mineralogy, Petrology and Geochemistry, 37(5): 903-909 (in Chinese with English abstract).
611	CX3039-3	Monzonite granite	101.804	30.1228	18	0.3	Zircon U–Pb(SHRIMP)	Liu Shuwen, Wang Zongqi, Yan Quanren, Li Qiugen, Zhang Dehui, Wang Jianguo. 2006. Timing, petrogenesis and geodynamic significance of Zheduoshan Granitoids. Acta Petrologica Sinica, 22(2): 343-352 (in Chinese with English abstract).
612	PM01- 7TW	Biotite monzonite granite porphyry	97.4326	31.5619	41.7	0.3	Zircon U–Pb(LA-ICP-MS)	Bai Tao, Fan Bingliang, Xiao Xia, Zhang Chengjiang, Feng Dexin. 2019. The Eocene magmatism and mineralization of Xiariduo rocks in the northern Yulong porphyry copper belt, Tibet: Evidence from zircon U-Pb geochronology and geochemistry. Geoglogical Bulletin of China, 38(2/3): 308-327 (in Chinese with English abstract).
613	PM02- 4TW	Biotite monzonite granite porphyry	97.4337	31.5619	41.6	0.3	Zircon U–Pb(LA-ICP-MS)
614	PM01- 14TW	Quartz diorite porphyrite	97.4329	31.5626	41.2	0.2	Zircon U–Pb(LA-ICP-MS)
615	PM02-5TW	Quartz diorite porphyrite	97.4314	31.5614	41.1	0.2	Zircon U–Pb(LA-ICP-MS)
616	D5054	Quartz monzonite porphyry	98.5979	29.9656	36.41	0.3	Zircon U–Pb(LA-ICP-MS)	Liu Buzhen. 2018. The Petrology and Litho-geochemistry Characteristics of the Granitoid Rocks of Mts.Mangkangshan Area in East Tibet (Master dissertation). Chengdu University of Technology, Chengdu (in Chinese with English abstract).
617	D6074TW	Trachyte	98.5446	29.9144	32.1	0.19	Zircon U–Pb(LA-ICP-MS)	Qin Fengyan. 2018. The Petrology and Litho-geochemistry Characteristics of the Volcanic Rocks in Mts.Mangkangshan Area and its Significance, East Tibet (Master dissertation). Chengdu University of Technology, Chengdu (in Chinese with English abstract).
618	DP-86-1	Granodiorite	22.9174	103.086	36.76	0.38	Zircon U–Pb(LA-ICP-MS)	Zhang Yaoyao, Zhang Da, Wu Ganguo, Di Yongjun, Li Xingjian, Bu Xingchen, Liu Jun. 2018. Origin of the Daping gold deposit in the Ailaoshan metallogenic belt, SW China: Insights from geology, isotope geochemistry and geochronology. Ore Geology Reviews, 96: 1-12.
619	JDS-18	Lamprophyre	100.432	25.5336	34.6	0.3	Zircon U–Pb(LA-ICP-MS)	Guo Hu, Lai Yong, Zhou Yitao, Lv Xin. 2020. The role of magma sources, oxygen fugacity, and fractionation in determining the Jiudingshan porphyry-skarn Cu–Mo deposit in Western Yunnan, China. Geological Journal, 1-24.
620	JDS-36-1	Monzogranitic porphyry	100.431	25.533	34.8	0.1	Zircon U–Pb(LA-ICP-MS)
621	JDS-07-1	Porphyritic-like granite	100.434	25.5341	34.1	0.1	Zircon U–Pb(LA-ICP-MS)
622	GP	Granite porphyry	100.433	25.5228	34.9	0.4	Zircon U–Pb(LA-ICP-MS)	Wang YingJing, Wang Xinsong, Bi Xian-Wu, Tao Yan, Lan Tingguang. 2020. Intraplate adakite-like rocks formed by differentiation of mantle-derived mafic magmas: A case study of Eocene intermediate-felsic porphyries in the Machangqing porphyry Cu-Au mining district, SE Tibetan plateau. Journal of Asian Earth Sciences, 196: 104364.
623	GDP	Granodiorite porphyry	100.425	25.5222	35.2	0.4	Zircon U–Pb(LA-ICP-MS)
624	QDP-Ι	Quartz diorite porphyry	100.426	25.5236	35.1	0.3	Zircon U–Pb(LA-ICP-MS)
625	QDP-Ⅱ	Quartz diorite porphyry	100.425	25.5225	34.2	0.5	Zircon U–Pb(LA-ICP-MS)
626	MCQGP-12	Granite porphyry	100.434	25.5222	35.92	0.31	Zircon U–Pb(LA-ICP-MS)	Yang Mimi, Zhao Fufeng, Liu Xianfan, Qing Hairuo, Raharimahefa Tsilavo, Duan Wenjing. 2020. Petrogenesis and geodynamic setting of granitoids at Machangqing Cu–Mo (Au) deposit, western Yangtze craton, southwestern China: constraints from zircon U–Pb and molybdenite Re–Os geochronology, Lu–Hf isotopes, and geochemistry. Canadian journal of earth sciences, 57: 1066-1088.
627	MCQPG-5	Porphyritic granite	100.433	25.5208	34.92	0.31	Zircon U–Pb(LA-ICP-MS)
628	MH16-3	Quartz syenite	102.626	23.0667	36.01	0.15	Zircon U–Pb(LA-ICP-MS)	Dong Chaoyi, Li Gongjian, Yu Huazhi, Yang Lin, Li Huajian. 2020. Petrogenesis and tectonic significance of the Fenshuiling and Mengha granitic plutons, SW China: insights from bulk elements, zircon U-Pb ages and Sr-Nd-Hf isotopes. International Geology Review, DOI: 10.1080/00206814.2019.1709222.
629	FSL16-1	Quartz syenite	102.485	23.0903	35.29	0.28	Zircon U–Pb(LA-ICP-MS)
630	FSL16-4	Quartz syenite	102.485	23.0356	35.65	0.18	Zircon U–Pb(LA-ICP-MS)
631	MCQGP-6	Granite porphyry	100.435	25.5217	34.06	0.27	Zircon U–Pb(LA-ICP-MS)	Yang Mimi, Zhao Fufeng, Liu Xianfan, Qing Hairuo, Chi Guoxiang, Li Xingyuan, Duan Wenjing, Lai ChunKit. 2020. Contribution of magma mixing to the formation of porphyry-skarn mineralization in a post-collisional setting: the Machangqing Cu-Mo-(Au) deposit, Sanjiang tectonic belt, SW China. Ore Geology Reviews, 122: 103518.
632	MCQPG-13	Porphyritic granite	100.431	25.5222	35.19	0.32	Zircon U–Pb(LA-ICP-MS)
633	YJ25	Granite	97.9434	24.8423	64	1	Zircon U–Pb(LA-ICP-MS)	Zhao Shaowei, Lai Shaocong, Pei Xianzhi, Li Zuochen, Li Ruibao, Qin Jiangfeng, Zhu Renzhi, Chen Youxin, Wang Meng, Pei Lei, Liu Chenjun, Gao Feng. 2020. Neo-Tethyan evolution in southeastern extension of Tibet: Constraints from Early Paleocene to Early Eocene granitic rocks with associated enclaves in Tengchong Block. Lithos, 364-365: 105551.
634	SD02	Granite	97.9439	25.0965	63	1	Zircon U–Pb(LA-ICP-MS)
635	SD03	Granite	97.9531	25.0714	54	1	Zircon U–Pb(LA-ICP-MS)
636	YJ03	Granite	97.9411	24.8654	53	1	Zircon U–Pb(LA-ICP-MS)
637	SD11	Granite	97.9531	24.953	53	1	Zircon U–Pb(LA-ICP-MS)
638	YS1604	Biotite monzonite porphyry	100.954	27.1084	33.89	0.5	Zircon U–Pb(LA-ICP-MS)	Li Chen. 2019. Geochemistry and Geochronology of Cenozoic Alkali-rich Porphyries in Nilang, Yunnan Province (Master dissertation). China University of Geosciences, Beijing (in Chinese with English abstract).
639	YS1606	Biotite monzonite porphyry	100.919	26.9847	34.36	0.62	Zircon U–Pb(LA-ICP-MS)
640	YS1608	Biotite syenite	100.927	27.0019	33.51	0.58	Zircon U–Pb(LA-ICP-MS)
641	YS1603	Biotite syenite porphyry	100.954	27.1084	34.9	1.2	Zircon U–Pb(LA-ICP-MS)
642	YS1610	Biotite syenite porphyry	100.934	27.018	34.31	0.67	Zircon U–Pb(LA-ICP-MS)
643	YS1612	Biotite syenite porphyry	100.885	27.0249	33.67	0.65	Zircon U–Pb(LA-ICP-MS)
644	ZP1602	Nepheline syenite	99.4878	25.4931	34.9	0.3	Zircon U–Pb(LA-ICP-MS)	Miao Zhuang, Zhao Zhidan, Lei Hangshan, Wu Jingkai, Yang Yiyun, Tong Xin. 2020. Genesis of LREE-enriched zircons and their highly radiogenic Hf compositions: A case study from Zhuopan alkaline complex in western Yunnan. Acta Petrologica Sinica, 36(9): 2765-2784 (in Chinese with English abstract).
645	ZP1607	Nepheline syenite	99.4147	25.4961	35.1	0.2	Zircon U–Pb(LA-ICP-MS)
646	ZP1616	Pyroxenite	99.4303	25.4833	35.6	0.3	Zircon U–Pb(LA-ICP-MS)
647	ZP1612	Syenite	99.4311	25.4722	35.7	0.3	Zircon U–Pb(LA-ICP-MS)
648	ZP1618-2	Syenite	99.4175	25.4917	35.7	0.4	Zircon U–Pb(LA-ICP-MS)
649	ZP1620	Syenite	99.4842	25.5361	34.2	0.3	Zircon U–Pb(LA-ICP-MS)
650	LC1601+LC1605	Biotite hornblende syenite porphyry	100.948	27.0578	35.5	0.4	Titanite U-Pb(LA-ICP-MS)	Ma Qian, Chen Yueheng, Zhao Zhidan, Tong Xin, Wu Jingkai, Miao Zhuang, Li Chen, Lei Hangshan. 2020. Titanite geochronology and geochemistry of the Cenozoic alkali-rich intrusions in the Ailaoshan-Red Shear Zone, Yunnan Province. Acta Petrologica Sinica, 36(9): 2751-2764 (in Chinese with English abstract).
651	SG1708	Biotite monzonite porphyry	99.78	26.7708	37.9	2.4	Titanite U-Pb(LA-ICP-MS)
652	YS1602+YS1612	Biotite monzonite porphyry	100.944	27.0528	32.5	0.6	Titanite U-Pb(LA-ICP-MS)
653	BSZ1604+BSZ1605	Hornblende syenite porphyry	103.264	22.7609	35.6	1.5	Titanite U-Pb(LA-ICP-MS)
654	TCX1608	Syenite porphyry	103.082	22.7495	33.7	0.7	Tianite U-Pb(LA-ICP-MS)
655	TH03-1	Granite porphyry	99.7644	26.785	36.35	0.35	Zircon U–Pb(SHRIMP)	Hong Tao, You Jun, Wu Chu, Xu Xingwang. 2015. Archean-Paleoproterozoic zircons from a granite porphyry in the Taohua area, western Yunnan and their constrain on the basement of western margin of Yangtze plate. Acta Petrologica Sinica, 31(9): 2583-2596 (in Chinese with English abstract).
656	CD321-1	Granite dyke	99.6713	26.6175	34.73	0.76	Zircon U–Pb(LA-ICP-MS)	Gourbet Loraine, Leloup Philippe Hervé, Paquette Jean-Louis, Sorrel Philippe, Maheo Gweltaz, Wang GuoCan, Xu Yadong, Cao Kai, Antoine Pierre-Olivier, Eymard Inès, Liu Wei, Lu Haijian, Replumaz Anne, Chevalier Marie-Luce, Zhang Kexin, Wu Jing, Shen Tianyi. 2017. Reappraisal of the Jianchuan Cenozoic basin stratigraphy and its implications on the SE Tibetan plateau evolution. Tectonophysics, 700-70…
657	J284	Rhyolitic tuff	99.8509	26.6324	34.8	1.1	Zircon U–Pb(LA-ICP-MS)
658	J296	Trachy-andesite (neck)	99.8929	26.6755	33.7	0.9	Zircon U–Pb(LA-ICP-MS)
659	J121	Trachy-andesitic lava flow	99.8672	26.4477	35.8	0.3	Zircon U–Pb(LA-ICP-MS)
660	J120	Trachy-andesitic lava flow	99.8672	26.4477	35	1	Zircon U–Pb(LA-ICP-MS)
661	J203	Volcanic tuff	99.8531	26.5904	36.4	0.3	Zircon U–Pb(LA-ICP-MS)
662	J168A	Volcaniclastic	99.8529	26.597	35.7	0.2	Zircon U–Pb(LA-ICP-MS)
663	J161	Volcanoclastic	99.8919	26.5913	35.9	1.1	Zircon U–Pb(LA-ICP-MS)
664	J278	Volcanoclastic	99.877	26.5918	36.8	1	Zircon U–Pb(LA-ICP-MS)
665	J308	Volcanoclastic	99.6484	26.4346	34.74	0.17	Zircon U–Pb(LA-ICP-MS)
666	JDS02-27	Granite porphyry	100.432	25.5331	36.1	0.2	Zircon U–Pb(LA-ICP-MS)	Liu Qiaofen, Sun Xiaoming, Li Dengfeng, Fu Yu, Yang Tianjian, Liu Zhangrong, Yin Rong, Tong Zida. 2020. Geochronology and fluid evolution of the Machangqing Cu-Mo polymetallic deposit, western Yunnan, SW China. Ore Geology Reviews, 127: 103828.
667	13LH02	Granodiorite	98.3978	24.7256	48.5	0.4	Zircon U–Pb(LA-ICP-MS)	Xie Jincheng, Zhu Dicheng, Dong Guochen, Zhao Zhidan, Wang Qing, Mo Xuanxue. 2016. Linking the Tengchong Terrane in SW Yunnan with the Lhasa Terrane in southern Tibet through magmatic correlation, Gondwana Research, 39: 217-229.
668	13XQ02	Granodiorite	98.2939	25.0622	50.4	0.4	Zircon U–Pb(LA-ICP-MS)
669	13TP08	Granodiorite	97.7675	24.6617	55	0.5	Zircon U–Pb(LA-ICP-MS)
670	13ZN03	Granodiorite	98.1006	25.2469	53.6	0.2	Zircon U–Pb(LA-ICP-MS)
671	13LLS04–1	Monzogranite	98.2592	24.9253	50.5	0.4	Zircon U–Pb(LA-ICP-MS)
672	13SD10	Monzogranite	97.9514	25.1142	58.9	0.5	Zircon U–Pb(LA-ICP-MS)
673	AM-3	Cu mine	95.04	22.04	14	1	Zircon U–Pb(LA-ICP-MS)	Lin Te-Hsien, Mitchell A. H. G., Chung Sun-Lin, Tan Xi-Bin, Tang Jui-Ting, Oo Thura, Wu Fu-Yuan. 2019. Two parallel magmatic belts with contrasting isotopic characteristics from southern Tibet to Myanmar: zircon U–Pb and Hf isotopic constraints. Journal of the Geological Society, 176: 574-587.
674	BW5	Gneiss	98.24	25.76	49	1	Zircon U–Pb(LA-ICP-MS)
675	BW9	Gneiss	98.19	25.81	52	1	Zircon U–Pb(LA-ICP-MS)
676	M2	Granite	98.06	25.41	54	1	Zircon U–Pb(LA-ICP-MS)
677	M7	Granite	97.9	25.4	51	1	Zircon U–Pb(LA-ICP-MS)
678	M8	Granite	97.85	25.38	51	1	Zircon U–Pb(LA-ICP-MS)
679	BUR22	Trachyte	95.61	23.7	33	1	Zircon U–Pb(LA-ICP-MS)
680	Kl	Dacite dyke	96.2857	20.771	50	0.6	Zircon U–Pb(LA-ICP-MS)	Mitchell Andrew, Chung Sun-Lin, Oo Thura, Lin Te-Hsien, Hung Chien-Hui. 2012. Zircon U–Pb ages in Myanmar: Magmatic–metamorphic events and the closure of a neo-Tethys ocean? Journal of Asian Earth Sciences, 56: 1-23.
681	A8	Dacite porphyry dyke	96.2334	20.7454	20.7	0.3	Zircon U–Pb(LA-ICP-MS)
682	A10	Dacite porphyry dyke	96.2242	20.7406	20.7	0.5	Zircon U–Pb(LA-ICP-MS)
683	D2	Granite dyke	96.3168	22.3526	17	0.3	Zircon U–Pb(LA-ICP-MS)
684	MEC 1	Granite dyke	96.1633	21.6779	44.8	2.7	Zircon U–Pb(LA-ICP-MS)
685	SedoA	Granite population	96.3306	20.3286	48	0.9	Zircon U–Pb(LA-ICP-MS)
686	SedoA	Granite population	96.3306	20.3286	53.8	0.8	Zircon U–Pb(LA-ICP-MS)
687	10-BUR-36	Microdiorite	96.1292	21.6828	44.6	0.5	Zircon U–Pb(LA-ICP-MS)
688	Belin A	Pegmatitic granite dyke	96.1292	21.6826	45.9	0.7	Zircon U–Pb(LA-ICP-MS)
689	T993	Hb-gabbro dyke	95.3008	29.3065	50.7	0.8	Zircon U–Pb(LA-ICP-MS)	Pan Fa-Bin, Zhang Hongfei, Xu Wangchun, Guo Liang, Luo BiJi, Wang Shuai. 2016. U–Pb zircon dating, geochemical and Sr–Nd–Hf isotopic compositions of mafic intrusive rocks in the Motuo, SE Tibet constrain on their petrogenesis and tectonic implication. Lithos, 245: 133-146.
690	T1000	Hb-gabbro dyke	95.3442	29.3377	51.3	0.7	Zircon U–Pb(LA-ICP-MS)
691	T1008	Hb-gabbro enclave	95.3494	29.3309	50.4	1.2	Zircon U–Pb(LA-ICP-MS)
692	Y09-08	Biotite mylonitic granite	98.8726	27.0334	34.4	0.35	Zircon U–Pb(LA-ICP-MS)	Zhang Bo, Zhang Jinjiang, Chang Zufeng, Wang Xiaoxian, Cai Fulong, Lai Qingzhou. 2012. The Biluoxueshan transpressive deformation zone monitored by synkinematic plutons, around the Eastern Himalayan Syntaxis. Tectonophysics, 574-575: 158-180.
693	Y09-39	Leucogranite dike	98.8752	27.0358	22.84	0.23	Zircon U–Pb(LA-ICP-MS)
694	Y09-03	Mylonitic granite	98.9101	27.9695	32.46	0.48	Zircon U–Pb(LA-ICP-MS)
695	Y09-44	Mylonitic granite	99.266	25.4507	37.01	0.41	Zircon U–Pb(LA-ICP-MS)
696	Y09-44	Mylonitic granite	99.266	25.4507	32.07	0.91	Zircon U–Pb(LA-ICP-MS)
697	Y09-40	Undeformed granite	98.8763	27.035	46.61	0.41	Zircon U–Pb(LA-ICP-MS)
698	Y09-30	Undeformed granite	99.2686	25.4558	49.01	0.63	Zircon U–Pb(LA-ICP-MS)
699	M33	Biotite granite dike	96.1289	21.6828	59.5	0.9	Thorite U-Pb(LA-MC-ICPMS)	Searle M. P., Noble S. R., Cottle J. M., Waters D. J., Mitchell A. H. G., Hlaing Tin, Horstwood M. S. A. 2007. Tectonic evolution of the Mogok metamorphic belt, Burma (Myanmar) constrained by U-Th-Pb dating of metamorphic and magmatic rocks. Tectonics, 26: TC3014.
700	M5	Leucogranite	96.1536	22.0872	24.5	0.4	Monazite U-Th-Pb(LA-MC-ICPMS
701	M52	Leucogranite	96.1497	21.6081	46.3	0.6	Monazite U-Th-Pb(LA-MC-ICPMS
702	UB 069D	Leucocratic biotite syenogranite	96.3417	19.7917	22.64	0.4	Zircon U–Pb(SHRIMP)	Barley M. E., Pickard A. L., Zaw Khin, Rak P., Doyle M. G. 2003. Jurassic to Miocene magmatism and metamorphism in the Mogok metamorphic belt and the India-Eurasia collision in Myanmar. Tectonics, 22: 1019.
