# Supplementary material
Source: MDPI journal article supplement (https://www.mdpi.com/2076-3263/11/12/518)
Supplement: s1 [file s1 › Supplementary Table S3.xlsx]

## Sheet: Sheet1
Supplementary Table 3. U/Pb analytical results of zircons of plutons from the Yongping Basin, Southeastern Tibetan Plateau
Spot No.	isotopic ratios							ages (Ma)						discordance (%)
	207Pb/235U	1 sigma	206Pb/238U	1 sigma	207Pb/206Pb	1 sigma	U/Th Ratio	207Pb-235U	1 sigma	206Pb-238U	1 sigma	207Pb-206Pb	1 sigma
Zircon samples from plutons
Sample DX002-2: leucogranite
DX002-2-1	0.0182	0.00149	0.00303	0.0001	0.0438	0.00296	16.21	18	1	19.5	0.6	-81	146	-8
DX002-2-2	0.01809	0.00147	0.00279	9e-05	0.04828	0.00325	3.2	18	1	18	0.6	113	145	0
DX002-2-3	0.00424	0.00502	0.00282	0.00022	0.12872	0.14633	3	4	5	18	1	2081	2739	-127.273
DX002-2-4	0.01652	0.00494	0.00289	0.00021	0.03311	0.00867	28.49	17	5	19	1	-151	276	-11.1111
DX002-2-5	0.02003	0.0063	0.00279	0.00023	0.20663	0.0565	13.03	20	6	18	1	2879	449	10.5263
DX002-2-6	0.09691	0.01162	0.01459	0.00062	0.04989	0.00501	2.57	94	11	93	4	190	226	1.06952
DX002-2-7	0.02431	0.00397	0.00305	0.00016	0.06398	0.00883	4.85	24	4	20	1	741	291	18.1818
DX002-2-8	0.03035	0.00246	0.00416	0.00015	0.05396	0.00357	3.86	30	2	26.7	1	369	152	11.6402
DX002-2-9	0.01178	0.00436	0.0031	0.0002	0.03311	0.01111	3.63	12	4	20	1	-151	391	-50
DX002-2-10	0.02669	0.00259	0.00278	0.00011	0.06834	0.00547	3.1	27	3	17.9	0.7	879	161	40.5345
DX002-2-11	0.01775	0.00336	0.00285	0.00014	0.04857	0.00802	2.53	18	3	18.4	0.9	127	329	-2.1978
DX002-2-12	0.02908	0.00223	0.00297	0.00011	0.07189	0.00445	3.13	29	2	19.1	0.7	983	120	41.1642
DX002-2-13	0.0203	0.00203	0.00277	0.0001	0.05199	0.00436	3.57	20	2	17.9	0.6	285	189	11.0818
DX002-2-14	0.02063	0.00356	0.00303	0.00015	0.03311	0.00492	2.92	21	4	19.5	0.9	-151	167	7.40741
DX002-2-15	0.01794	0.00284	0.00324	0.00016	0.04882	0.00655	3.16	18	3	21	1	139	280	-15.3846
DX002-2-16	0.02021	0.00169	0.00281	0.00011	0.05162	0.00351	2.2	20	2	18.1	0.7	268	149	9.97375
DX002-2-17	0.02001	0.00253	0.003	0.00012	0.04987	0.00533	3.96	20	3	19.3	0.8	189	231	3.56234
DX002-2-18	0.01803	0.00299	0.00276	0.00013	0.05168	0.00735	2.49	18	3	17.8	0.9	271	271	1.11732
DX002-2-19	0.02533	0.00245	0.00296	0.00012	0.06646	0.00527	3	25	2	19	0.8	821	176	27.2727
DX002-2-20	0.01494	0.00257	0.00362	0.00014	0.03527	0.00534	3.33	15	3	23.3	0.9	-63	208	-43.342
DX002-2-21	0.01892	0.00181	0.00291	0.0001	0.0477	0.00381	2.89	19	2	18.7	0.6	84	154	1.59151
DX002-2-22	0.02253	0.00187	0.00301	9e-05	0.05274	0.00363	4.85	23	2	19.4	0.6	318	148	16.9811
DX002-2-23	0.02098	0.00153	0.00294	9e-05	0.05178	0.0031	2.12	21	2	18.9	0.6	276	148	10.5263
DX002-2-24	1.61106	0.18534	0.17031	0.00675	0.06861	0.00635	4.07	975	72	1014	37	887	201	-3.92157
DX002-2-25	0.01931	0.00185	0.00288	9e-05	0.04747	0.00384	2.93	19	2	18.5	0.6	73	170	2.66667
DX002-2-26	0.02007	0.00167	0.00273	0.0001	0.05304	0.00362	10.29	20	2	17.6	0.6	331	158	12.766
DX002-2-27	0.15091	0.02292	0.02621	0.00144	0.04784	0.00606	3.24	143	20	167	9	91	240	-15.4839
Sample DX003-4: leucogranite
DX003-4-2	1.53812	0.11322	0.08242	0.00282	0.13535	0.008	5.11	946	45	511	17	2169	106	59.7117
DX003-4-3	0.02314	0.00201	0.00357	0.00013	0.04737	0.00338	6.69	23	2	22.9	0.8	68	149	0.43573
DX003-4-4	0.30876	0.02554	0.04146	0.00158	0.05423	0.00364	1.81	273	20	262	10	381	143	4.11215
DX003-4-5	0.03451	0.0129	0.00347	0.00043	0.0334	0.01053	0.66	34	13	22	3	-139	384	42.8571
DX003-4-6	0.21065	0.01268	0.03062	0.00098	0.05018	0.00243	2.15	194	11	194	6	204	117	0
DX003-4-7	0.01128	0.01008	0.00303	0.00038	0.0334	0.02756	0.61	11	10	19	2	-139	1051	-53.3333
DX003-4-8	0.02582	0.0035	0.00354	0.00016	0.05607	0.00641	7.78	26	3	23	1	455	262	12.2449
DX003-4-9	0.02613	0.00723	0.00388	0.00032	0.08599	0.02037	2.16	26	7	25	2	1338	479	3.92157
DX003-4-10	0.01937	0.00343	0.00381	0.00017	0.03347	0.00518	16.34	19	3	25	1	-136	216	-27.2727
DX003-4-11	0.02318	0.00255	0.00366	0.00014	0.04712	0.00435	7.17	23	3	23.6	0.9	56	186	-2.57511
DX003-4-12	0.01268	0.00599	0.00282	0.00024	0.09876	0.04222	0.76	13	6	18	2	1601	853	-32.2581
DX003-4-13	0.25961	0.0149	0.03305	0.0011	0.05627	0.00258	3.4	234	12	210	7	463	97	10.8108
DX003-4-14	0.02991	0.00299	0.00423	0.00018	0.05342	0.00438	18.88	30	3	27	1	347	180	10.5263
DX003-4-15	0.03001	0.00314	0.00392	0.00019	0.05771	0.00491	12.87	30	3	25	1	519	180	18.1818
DX003-4-16	0.02652	0.0211	0.0042	0.0006	0.0334	0.024	0.55	27	21	27	4	-139	901	0
DX003-4-17	0.02495	0.01	0.0036	0.00039	0.08516	0.02955	0.77	25	10	23	3	1319	706	8.33333
DX003-4-18	0.04948	0.01194	0.00396	0.00041	0.12196	0.02411	0.95	49	12	25	3	1985	439	64.8649
DX003-4-19	0.02185	0.00148	0.00337	0.00012	0.04867	0.00266	5.96	22	1	21.7	0.7	132	120	1.373
DX003-4-20	0.02903	0.00371	0.00344	0.00015	0.0591	0.00635	11.06	29	4	22.1	1	571	232	27.0059
DX003-4-21	0.02385	0.00259	0.00377	0.00016	0.04536	0.00408	10.08	24	3	24	1	-1	169	0
DX003-4-22	0.02882	0.0059	0.0038	0.00024	0.05223	0.00909	6.18	29	6	24	2	295	342	18.8679
DX003-4-23	0.02869	0.00745	0.00378	0.00028	0.10538	0.02351	0.76	29	7	24	2	1721	421	18.8679
DX003-4-24	0.02184	0.00163	0.00343	0.00011	0.04578	0.0028	10.4	22	2	22.1	0.7	-14	121	-0.453515
DX003-4-25	0.01724	0.00303	0.00351	0.00015	0.0334	0.00512	6.13	17	3	22.6	1	-139	187	-28.2828
DX003-4-26	0.24825	0.01343	0.03754	0.00114	0.04859	0.00211	3.36	225	11	238	7	128	92	-5.61555
DX003-4-27	0.02118	0.00153	0.00348	0.00011	0.04488	0.00263	9.93	21	2	22.4	0.7	-26	125	-6.45161
DX003-4-28	0.20674	0.01764	0.03387	0.00118	0.04648	0.00326	1.85	191	15	215	7	23	136	-11.8227
DX003-4-29	0.02726	0.01585	0.00375	0.00052	0.0334	0.01704	0.85	27	16	24	3	-139	665	11.7647
DX003-4-30	0.05934	0.01389	0.00744	0.00055	0.07745	0.01538	0.74	59	13	48	4	1133	379	20.5607
Sample DXY006-5: Syenite
DXY06_5_1	4.934	0.055	0.3004	0.0014	0.119	0.0012	9	1807.4	9.5	1693.1	7.1	745	36	6.5305
DXY06_5_2	2.138	0.02	0.1973	0.0016	0.0789	0.00033	0.7224	1161	6.4	1160.7	8.7	84.7	1.4	0.0258431
DXY06_5_3	0.03963	0.00052	0.005511	4.4e-05	0.05218	0.00043	0.1368	39.46	0.5	35.43	0.28	966	48	10.7625
DXY06_5_4	0.03999	0.00052	0.005637	4.7e-05	0.05156	0.00061	0.17736	39.81	0.51	36.24	0.3	598	17	9.38856
DXY06_5_5	0.03901	0.00038	0.005527	3.7e-05	0.05111	0.00042	1.2917	38.86	0.37	35.53	0.24	888	19	8.95282
DXY06_5_6	0.4324	0.0045	0.05432	0.0003	0.05767	0.00045	3.042	364.8	3.2	341	1.8	681	30	6.74412
DXY06_5_7	0.347	0.011	0.03787	0.00041	0.0663	0.0018	2.569	301.5	8.2	239.6	2.6	104.8	5.8	22.8793
DXY06_5_8	0.2901	0.0043	0.03889	0.00044	0.05417	0.00046	1.682	258.5	3.4	245.9	2.7	138.2	4.3	4.99603
DXY06_5_9	0.762	0.011	0.01248	0.00011	0.4457	0.0042	0.2611	574.9	6.4	79.94	0.71	255	11	151.17
DXY06_5_10	0.03531	0.00026	0.005286	4.2e-05	0.04841	0.00029	0.8142	35.23	0.25	33.99	0.27	2210	170	3.58278
DXY06_5_11	0.27	0.0024	0.03809	0.0004	0.05134	0.00024	0.9197	242.7	1.9	241	2.5	567	25	0.702915
DXY06_5_12	10.32	0.13	0.4479	0.0055	0.16727	0.00026	2.232	2462	12	2385	25	542	31	3.17722
DXY06_5_13	1.0878	0.0078	0.12127	0.00086	0.065127	9.6e-05	2.047	747.4	3.8	737.8	4.9	1130	42	1.29276
DXY06_5_14	4.714	0.069	0.2477	0.0034	0.13811	0.00017	1.769	1770	12	1426	18	832	39	21.5269
DXY06_5_15	0.1	0.0043	0.006022	7.6e-05	0.1201	0.0047	0.3001	96.7	3.9	38.71	0.49	1159	73	85.651
DXY06_5_16	0.3052	0.0022	0.04167	0.00024	0.053	0.00025	1.894	270.5	1.7	263.2	1.5	401	16	2.73562
DXY06_5_17	0.637	0.015	0.07919	0.00096	0.06003	0.0003	44	500.6	9.6	491.3	5.7	1047	22	1.87519
Sample DX009-14: Syenite
DX009-14-1	1.91866	0.24196	0.12465	0.00639	0.11104	0.01152	1.07	1088	84	757	37	1816	174	35.8808
DX009-14-2	6.54377	0.49183	0.3766	0.01509	0.12361	0.00746	3.05	2052	66	2060	71	2009	97	-0.389105
DX009-14-3	7.21577	0.58009	0.45757	0.01717	0.1129	0.00736	3.63	2138	72	2429	76	1847	107	-12.7436
DX009-14-4	0.04435	0.01005	0.00597	0.00048	0.07653	0.01453	0.21	44	10	38	3	1109	371	14.6341
DX009-14-5	2.15789	0.16813	0.19318	0.00631	0.08074	0.00516	4.22	1168	54	1139	34	1215	114	2.51409
DX009-14-6	4.92523	0.62306	0.36681	0.01805	0.10145	0.01062	0.66	1807	107	2014	85	1651	179	-10.8349
DX009-14-7	0.42534	0.10903	0.0441	0.00465	0.08771	0.01848	1.14	360	78	278	29	1376	403	25.7053
DX009-14-8	6.23475	0.56613	0.38371	0.01287	0.11605	0.00877	1.37	2009	79	2094	60	1896	124	-4.14331
DX009-14-9	0.14288	0.01757	0.01817	0.00077	0.0583	0.00602	1.03	136	16	116	5	541	208	15.873
DX009-14-10	0.09354	0.02307	0.00579	0.00032	0.11384	0.02482	0.16	91	21	37	2	1862	394	84.375
DX009-14-11	19.3846	1.53563	0.58477	0.02111	0.23675	0.01525	12.16	3061	76	2968	86	3098	93	3.08509
DX009-14-12	0.29011	0.07259	0.0461	0.00296	0.04134	0.00901	1.65	259	57	291	18	-213	289	-11.6364
DX009-14-13	2.13483	0.29558	0.04031	0.00396	0.43779	0.04894	0.62	1160	96	255	25	4044	153	127.915
